1 **Integrated host-microbe metagenomics for sepsis diagnosis in critically ill adults**

2  
3 \*Katrina Kalantar<sup>1</sup>, \*Lucile Neyton<sup>2</sup>, Mazin Abdelghany<sup>3</sup>, Eran Mick<sup>3</sup>, Alejandra Jauregui<sup>2</sup>,  
4 Saharai Caldera<sup>3</sup>, Paula Hayakawa Serpa<sup>3</sup>, Rajani Ghale<sup>2,3</sup>, Jack Albright<sup>4</sup>, Aartik Sarma<sup>2</sup>,  
5 Alexandra Tsitsiklis<sup>3</sup>, Aleksandra Leligdowicz<sup>4</sup>, Stephanie Christenson<sup>2</sup>, Kathleen Liu<sup>5</sup>, Kirsten  
6 Kangelaris<sup>6</sup>, Carolyn Hendrickson<sup>3</sup>, Pratik Sinha<sup>7</sup>, Antonio Gomez<sup>8</sup>, Norma Neff<sup>9</sup>, Angela Pisco<sup>9</sup>,  
7 Sarah Doernberg<sup>3</sup>, Joseph L. Derisi<sup>9,10</sup>, Michael A. Matthay<sup>2</sup>, †Carolyn S. Calfee<sup>2</sup>, †Charles R.  
8 Langelier<sup>3,9</sup>.

9 \*†equal contributions

10

11

12 **Affiliations:**

13 <sup>1</sup>Chan Zuckerberg Initiative, San Francisco, CA, USA

14 <sup>2</sup>Department of Medicine, Division of Pulmonary, Critical Care, Allergy and Sleep Medicine,  
15 University of California San Francisco, San Francisco, CA, USA

16 <sup>3</sup>Department of Medicine, Division of Infectious Diseases, University of California San  
17 Francisco, San Francisco, CA, USA

18 <sup>4</sup>Department of Critical Care Medicine, Western University, London, Ontario, Canada

19 <sup>5</sup>Department of Medicine, Division of Nephrology, University of California San Francisco, San  
20 Francisco, CA, USA

21 <sup>6</sup>Department of Medicine, University of California San Francisco, San Francisco, CA, USA

22 <sup>7</sup>Washington University, St Louis, St. Louis, MO, USA

23 <sup>8</sup>Department of Medicine, Zuckerberg San Francisco General Hospital, San Francisco, CA, USA

24 <sup>9</sup>Chan Zuckerberg Biohub, San Francisco, CA, USA

25 <sup>10</sup>Department of Biochemistry and Biophysics, University of California San Francisco, San

26 Francisco, CA, USA

27

28 **Keywords:** sepsis, metagenomics, transcriptional profiling, classifier, machine learning, plasma

## 29 **Abstract**

30 Sepsis is a leading cause of death, and improved approaches for disease diagnosis and  
31 detection of etiologic pathogens are urgently needed. Here, we carried out integrated host and  
32 pathogen metagenomic next generation sequencing (mNGS) of whole blood (n=221) and  
33 plasma RNA and DNA (n=138) from critically ill patients following hospital admission. We  
34 assigned patients into sepsis groups based on clinical and microbiological criteria: 1) sepsis with  
35 bloodstream infection (Sepsis<sup>BSI</sup>), 2) sepsis with peripheral site infection but not bloodstream  
36 infection (Sepsis<sup>non-BSI</sup>), 3) suspected sepsis with negative clinical microbiological testing; 4) no  
37 evidence of infection (No-Sepsis), and 5) indeterminant sepsis status. From whole blood gene  
38 expression data, we first trained a bagged support vector machine (bSVM) classifier to  
39 distinguish Sepsis<sup>BSI</sup> and Sepsis<sup>non-BSI</sup> patients from No-Sepsis patients, using 75% of the cohort.  
40 This classifier performed with an area under the receiver operating characteristic curve (AUC) of  
41 0.81 in the training set (75% of cohort) and an AUC of 0.82 in a held-out validation set (25% of  
42 cohort). Surprisingly, we found that plasma RNA also yielded a biologically relevant  
43 transcriptional signature of sepsis which included several genes previously reported as sepsis  
44 biomarkers (e.g., *HLA-DRA*, *CD-177*). A bSVM classifier for sepsis diagnosis trained on RNA  
45 gene expression data performed with an AUC of 0.97 in the training set and an AUC of 0.77 in a  
46 held-out validation set. We subsequently assessed the pathogen-detection performance of DNA  
47 and RNA mNGS by comparing against a practical reference standard of clinical bacterial culture  
48 and respiratory viral PCR. We found that sensitivity varied based on site of infection and  
49 pathogen, with an overall sensitivity of 83%, and a per-pathogen sensitivity of 100% for several  
50 key sepsis pathogens including *S. aureus*, *E. coli*, *K. pneumoniae* and *P. aeruginosa*.  
51 Pathogenic bacteria were also identified in 10/37 (27%) of patients in the No-Sepsis group. To  
52 improve detection of sepsis due to viral infections, we developed a secondary RNA host  
53 transcriptomic classifier which performed with an AUC of 0.94 in the training set and an AUC of  
54 0.96 in the validation set. Finally, we combined host and microbial features to develop a proof-

55 of-concept integrated sepsis diagnostic model that identified 72/73 (99%) of microbiologically  
56 confirmed sepsis cases, and predicted sepsis in 14/19 (74%) of suspected, and 8/9 (89%) of  
57 indeterminate sepsis cases. In summary, our findings suggest that integrating host  
58 transcriptional profiling and broad-range metagenomic pathogen detection from nucleic acid  
59 may hold promise as a tool for sepsis diagnosis.

## 60 Introduction

61 Sepsis causes 20% of all deaths globally and contributes to 20-50% of hospital deaths in  
62 the United States alone<sup>1,2</sup>. Early diagnosis and identification of the underlying microbial  
63 pathogens is essential for timely and appropriate antibiotic therapy, which is critical for sepsis  
64 survival<sup>3,4</sup>. Yet in over 30% of cases, no etiologic pathogen is identified<sup>5</sup>, reflecting the  
65 limitations of current culture-based microbiologic diagnostics<sup>6</sup>. Adding additional complexity is  
66 the need to differentiate sepsis effectively from non-infectious systemic illnesses, which often  
67 appear clinically similar at the time of hospital admission.

68 As a result, antibiotic treatment often remains empiric rather than pathogen-targeted,  
69 with clinical decision-making based on epidemiological information rather than individual patient  
70 data. Similarly, clinicians often continue empiric antimicrobials despite negative microbiologic  
71 testing for fear of harming patients in the setting of falsely negative results. Both scenarios lead  
72 to antimicrobial overuse and misuse, which contributes to treatment failures, opportunistic  
73 infections such as *C. difficile* colitis, and the emergence of drug-resistant organisms<sup>7</sup>.

74 With the introduction of culture-independent methods such as metagenomic next  
75 generation sequencing (mNGS), limitations in sepsis diagnostics may be overcome<sup>8,9</sup>. Recent  
76 advancements in plasma cell-free DNA sequencing have expanded the scope of metagenomic  
77 diagnostics by enabling minimally invasive detection of circulating pathogen nucleic acid  
78 originating from diverse anatomical sites of infection<sup>9</sup>. The clinical impact of plasma DNA  
79 metagenomics has been questioned, however, due to frequent identification of microbes of  
80 uncertain clinical significance, inability to detect RNA viruses that cause pneumonia, and limited  
81 utility in ruling-out presence of infection<sup>10,11</sup>.

82 Whole blood transcriptional profiling offers the potential to mitigate these limitations by  
83 capturing host gene expression signatures that distinguish infectious from non-infectious  
84 conditions, and viral from bacterial infections<sup>12,13</sup>. However, because transcriptional profiling  
85 exclusively captures the host response to infection, it does not provide precise taxonomic

86 identification of sepsis pathogens, which limits the utility of this approach when performed alone.  
87 Further, transcriptional profiling has traditionally required isolating peripheral-blood mononuclear  
88 cells, or stabilizing whole blood in specialized collection tubes, and it has remained unknown  
89 whether a simple plasma specimen could yield informative data for host-based infectious  
90 disease diagnosis.

91 In recent work, a single-sample metagenomic approach combining host transcriptional  
92 profiling with unbiased pathogen detection was developed to improve lower respiratory tract  
93 infection diagnosis<sup>14</sup>. Sepsis, defined as, “life-threatening organ dysfunction from a dysregulated  
94 host response to infection<sup>15</sup>,” provides an additional clear use case for this integrated host-  
95 microbe metagenomics approach. Here, we study a prospective cohort of critically ill adults to  
96 develop a novel sepsis diagnostic assay that combines host transcriptional profiling with broad-  
97 range pathogen identification. By applying machine learning to high dimensional mNGS data,  
98 we evaluate host and microbial features that distinguish microbiologically confirmed sepsis from  
99 non-infectious critical illness. We then demonstrate that plasma nucleic acid can be used to  
100 profile both host and microbe for precision sepsis diagnosis.

101

## 102 **Results**

### 103 Clinical features of study cohort

104 We conducted a prospective observational study of critically ill adults admitted from the  
105 Emergency Department (ED) to the Intensive Care Unit (ICU) at two tertiary care hospitals  
106 (**Figure 1**). Patients were categorized into five subgroups based on sepsis status (**Methods**).  
107 These included patients with: 1) clinically adjudicated sepsis and a microbiologically confirmed  
108 bacterial bloodstream infection (Sepsis<sup>BSI</sup>), 2) clinically adjudicated sepsis and a  
109 microbiologically confirmed non-bloodstream infection (Sepsis<sup>non-BSI</sup>), 3) suspected sepsis with  
110 negative clinical microbiologic testing (Sepsis<sup>suspected</sup>), 4) patients with no evidence of sepsis and  
111 a clear alternative explanation for their critical illness (No-Sepsis), or 5) patients of indeterminate

112 status (Indeterm). The most common diagnoses in the No-Sepsis group were cardiac arrest,  
113 overdose/poisoning, heart failure exacerbation, and pulmonary embolism. The majority of  
114 patients, regardless of subgroup, required mechanical ventilation and vasopressor support  
115 (**Supplementary Table 1**). Patients with microbiologically proven sepsis (Sepsis<sup>BSI</sup> + Sepsis<sup>non-</sup>  
116 <sup>BSI</sup>) did not differ from No-Sepsis patients in terms of age, gender, race, ethnicity,  
117 immunocompromise, APACHEIII score, maximum white blood cell count, intubation status, or  
118 28-day mortality (**Figure 1, Supplementary Table 1**). All but one patient (in the No-Sepsis  
119 group) exhibited  $\geq 2$  systemic inflammatory response syndrome (SIRS) criteria<sup>16</sup>.

#### 120 Host transcriptional signature of sepsis from whole blood

121 We first assessed transcriptional differences between patients with clinically and  
122 microbiologically confirmed sepsis (Sepsis<sup>BSI</sup>, Sepsis<sup>non-BSI</sup>) versus those without evidence of  
123 infection (No-Sepsis) by performing RNA sequencing (RNA-seq) on whole blood specimens (n  
124 = 221 total) to obtain a median of  $5.8 \times 10^7$  (95% CI  $5.3$ - $6.3 \times 10^7$ ) reads per sample. 5,807  
125 differentially expressed (DE) genes were identified at an adjusted P value  $< 0.1$  (**Figure 2a,**  
126 **Supplementary Data 1**). Gene set enrichment analysis (GSEA), a method that identifies groups  
127 of genes within a dataset sharing common biological functions<sup>17</sup>, demonstrated upregulation of  
128 genes related to neutrophil degranulation and innate immune signaling in the patients with  
129 sepsis, with concomitant downregulation of pathways related to translation and rRNA  
130 processing (**Figure 2b, Supplementary Data 2**).

131 To further characterize differences between sepsis patients with bloodstream versus  
132 peripheral site (e.g., respiratory, urinary tract) infections, we performed differential gene  
133 expression (DE) analysis between the Sepsis<sup>BSI</sup> and Sepsis<sup>non-BSI</sup> groups, which identified 5,227  
134 genes (**Supplementary Data 3**). GSEA demonstrated enrichment in genes related to CD28  
135 signaling, immunoregulatory interactions between lymphoid and non-lymphoid cells, and other  
136 functions in the Sepsis<sup>non-BSI</sup> patients, while the Sepsis<sup>BSI</sup> group was characterized by

137 enrichment in genes related to antimicrobial peptides, defensins, G alpha signaling and other  
138 pathways (**Supplementary Data 4**).

#### 139 Host transcriptional classifier for sepsis diagnosis from whole blood

140         Given the practical necessity to identify sepsis in both Sepsis<sup>BSI</sup> and Sepsis<sup>non-BSI</sup>  
141 patients, we constructed a 'universal' sepsis diagnostic classifier based on whole blood gene  
142 expression signatures. After dividing the cohort (n=221) into independent training (75% of data,  
143 n=165) and validation (25% of data, n=56) groups, we employed a bagged support vector  
144 machine learning approach (bSVM) to select genes that most effectively distinguished patients  
145 with sepsis (Sepsis<sup>BSI</sup> and Sepsis<sup>non-BSI</sup>) from those without (No-Sepsis). We elected to use a  
146 bSVM model due to better performance compared to random forest and gradient boosted trees,  
147 which were also tested (**Supplementary Table 2**). The bSVM model achieved an average  
148 cross-validation AUC of 0.81 (standard deviation (SD) 0.05) over 10 random splits within the  
149 training dataset (75% of data, n=165). In the held-out validation set (25% of data, n=56), an  
150 AUC of 0.82 was obtained. Additionally, an AUC of 0.85 (SD 0.02) was obtained over 10  
151 randomly-generated validation sets (**Figure 2c, Supplementary Data 5**).

#### 152 Host transcriptional classifier for sepsis diagnosis from plasma RNA

153         Sequencing of plasma DNA has emerged as a preferred strategy for culture-  
154 independent detection of bacterial pathogens in the bloodstream<sup>9</sup>. It remained unknown,  
155 however, whether plasma RNA could provide meaningful and biologically relevant gene  
156 expression data, as sepsis transcriptional profiling studies have historically relied on isolation of  
157 PBMCs or collection of whole blood.

158         To test this, we sequenced RNA from patients with available plasma specimens  
159 matched to the whole blood samples, and obtained a median of  $2.3 \times 10^7$  (95% CI  $2.2-2.5 \times 10^7$ )  
160 reads per sample. Calculation of input RNA mass (**Methods**) demonstrated that samples with  
161 transcript counts below our QC cutoff (< 50,000) had a lower average input mass than those



162 with sufficient counts (65.2 pg versus 85.8 pg, respectively,  $p < 0.0001$ , **Supplementary Data**  
163 **8**). After filtering to retain samples with  $\geq 50,000$  transcripts ( $n=138$ ), we performed DE  
164 analysis to assess whether a biologically plausible signal could be observed between patients  
165 with sepsis (Sepsis<sup>BSI</sup> and Sepsis<sup>non-BSI</sup>,  $n=73$ ) and those without (No-Sepsis,  $n=37$ ), and found  
166 62 genes at an adjusted P value  $< 0.1$  (**Supplementary Data 6**), 28 of which were also  
167 significant in the whole blood analysis (**Supplementary Figure 1**). Remarkably, several of the  
168 top differentially expressed genes were previously reported sepsis biomarkers (e.g., elevated  
169 *CD177*, suppressed *HLA-DRA*),<sup>18-21</sup> suggesting a biologically relevant transcriptomic signature  
170 from plasma RNA (**Figure 2d, Supplementary Data 6**).

171 We then asked whether a host transcriptional sepsis diagnostic classifier could be  
172 constructed using plasma RNA transcriptomic data by dividing the cohort into independent  
173 training (75% of data,  $n=82$ ) and validation groups ( $n=28$ ), and employing the same bSVM  
174 approach to select genes that most effectively distinguished Sepsis<sup>BSI</sup> and Sepsis<sup>non-BSI</sup> patients  
175 from No-Sepsis patients. This approach yielded a classifier that achieved an average cross-  
176 validation AUC of 0.97 (SD 0.03) over 10 random splits within the training dataset (75% of data,  
177  $n=82$ ). In the held-out validation set (25% of data,  $n=28$ ), an AUC of 0.77 was obtained. An AUC  
178 of 0.90 (SD 0.06) was obtained over 10 randomly-generated validation sets (**Figure 2e,**  
179 **Supplementary Data 7**).

#### 180 Detection of bacterial sepsis pathogens from plasma nucleic acid

181 We began microbial metagenomic analyses by assessing DNA microbial mass  
182 (**Methods**), which was significantly lower in negative control water samples, but did not differ  
183 between adjudicated sepsis groups (**Figure 3a, Supplementary Data 8**). We next carried out  
184 bacterial pathogen detection using the IDseq pipeline<sup>22</sup> for taxonomic alignment followed by a  
185 previously developed rules-based model (RBM)<sup>14</sup> that identifies established sepsis pathogens  
186 overrepresented in mNGS data compared to less abundant commensal or contaminating

187 microbes<sup>14</sup> (**Methods, Figure 3b**).

188 We then asked how well the metagenomic RBM pathogen predictions agreed with  
189 bacterial blood culture data. Polymicrobial blood cultures of  $\geq 3$  organisms were excluded (n=2)  
190 given their unclear clinical significance, leaving a total of 40 blood culture-positive cases  
191 available for comparison (**Supplementary Data 9**). Sensitivity versus blood culture as a  
192 reference standard was 83%, and varied by pathogen, ranging from 0% (e.g., *C. difficile*) to  
193 100% (e.g., *E. coli*, *S. aureus/argenteus* **Figure 3c**). Pathogens were called by the RBM in  
194 10/37 (27%) of patients in the No-Sepsis group, equating to a specificity of 73%.

#### 195 Detection of sepsis pathogens from peripheral sites using plasma nucleic acid

196 Plasma DNA mNGS identified 2/25 (8%) of culture-confirmed bacterial lower respiratory  
197 tract infection (LRTI) pathogens in the Sepsis<sup>non-BSI</sup> group and 3/8 (38%) culture-confirmed  
198 bacterial urinary tract infection (UTI) pathogens (**Figure 3d, Supplementary Data 9**). mNGS  
199 did not identify *C. difficile* in any of the three patients with severe colitis from this organism.  
200 Additional putative bacterial pathogens not detected by culture were detected in 8/73 (11%) of  
201 patients with microbiologically confirmed sepsis (**Supplementary Data 9**).

#### 202 Identification of viral infections using host transcriptional profiling of RNA and whole blood

203 Only one of 13 (8%) respiratory viruses identified by clinical testing could be detected by  
204 plasma RNA mNGS (**Supplementary Data 9**). Recognizing that an alternative approach would  
205 be needed, we asked whether host response could instead be used to identify viral sepsis by  
206 carrying out differential gene expression analysis of patients with or without clinically confirmed  
207 viral sepsis within the Sepsis<sup>BSI</sup> and Sepsis<sup>non-BSI</sup> groups, using whole blood (**Supplementary**  
208 **Data 10**) or plasma (**Supplementary Data 11**) transcriptomic data. GSEA demonstrated that  
209 pathways related to interferon signaling and genes important for antiviral immunity were  
210 enriched in samples from patients with viral sepsis versus those with bacterial sepsis, in data  
211 derived from both whole blood (**Figure 4a, Supplementary Data 12a**) and plasma (**Figure 4b,**

212 **Supplementary Data 12b)** datasets.

213 We then leveraged this host signature to build a secondary bSVM diagnostic classifier  
214 for viral sepsis selecting differentially expressed genes as potential predictors, which on whole  
215 blood samples achieved an average cross-validation AUC of 0.90 (SD 0.07) over 10 random  
216 splits within the training dataset (75% of data, n=96). In the held-out validation set (25% of data,  
217 n=33), an AUC of 0.79 was obtained. An AUC of 0.87 (SD 0.04) was obtained over 10  
218 randomly-generated validation sets (**Figure 4c, Supplementary Data 13**). Slightly better  
219 performance was obtained when building a classifier using plasma RNA-seq data, with an  
220 average cross-validation AUC of 0.94 (SD 0.09) over 10 random splits within the training  
221 dataset (75% of data, n=54). In the held-out validation set (25% of data, n=19), an AUC of 0.96  
222 was obtained. An AUC of 0.94 (SD 0.07) was obtained over 10 randomly-generated validation  
223 sets (**Figure 4d, Supplementary Data 14**). Incorporation of the host-based viral sepsis  
224 classifier improved the sensitivity versus clinical respiratory viral PCR testing to 12/13 (92%),  
225 and predicted viral infection in one additional Sepsis<sup>non-BSI</sup> patient who didn't undergo viral PCR  
226 testing (**Supplementary Data 15**).

#### 227 Integrated host-microbe sepsis diagnostic model using plasma nucleic acid

228 Given the relative success of each independent host and pathogen model, we  
229 considered whether combining them could enhance diagnosis, and potentially serve as a sepsis  
230 rule-out tool. To test this possibility, we developed a proof-of-concept integrated host + microbe  
231 model based on simple rules. It returned a sepsis diagnosis based on either host criteria: [host  
232 sepsis classifier probability > 0.5] or microbial criteria: [(pathogen detected by RBM)  
233 AND (microbial mass > 20 pg)] OR [host viral classifier probability > 0.9]. Applying  
234 these rules enabled detection of 42/42 (100%) of cases in the Sepsis<sup>BSI</sup> group and 30/31 (97%)  
235 of cases in the Sepsis<sup>non-BSI</sup> subjects, for an overall sensitivity of 72/73 (99%) (**Figures 5a, 5b**).  
236 This proof-of-concept model yielded a specificity of 29/37 (78%) within the No-Sepsis subjects

237 **(Figure 5c, Supplementary Data 15).**

238 Application of the integrated model to suspected and indeterminant sepsis cases

239 Next, we asked whether patients with clinically adjudicated sepsis, but negative in-  
240 hospital microbiologic testing (Sepsis<sup>suspected</sup>) would be predicted to have sepsis using the  
241 integrated host-microbe plasma mNGS model. 14/19 (74%) were classified as having sepsis,  
242 **(Figure 5d)**, eight of which had a putative bacterial pathogen identified. Two additional patients  
243 had viral host classifier probabilities > 0.5, but did not meet the threshold for sepsis-positivity in  
244 the integrated model. With respect to the indeterminate group, the integrated host + microbe  
245 model classified 8/9 (89%) as sepsis-positive **(Figure 5e, Supplementary Data 15)**. Of these,  
246 two had a putative bacterial pathogen identified and one had a putative viral infection identified  
247 by the viral host classifier.

248

249 Comparison against clinical variable models for sepsis diagnosis

250 Lastly, we asked how host/microbe mNGS compared against sepsis diagnostic models  
251 derived exclusively from clinical metrics that would be available at the time of initial evaluation in  
252 the ED. We tested three different machine learning methods to distinguish Sepsis (Sepsis<sup>BSI</sup>  
253 and Sepsis<sup>non-BSI</sup>) from No-Sepsis patients, using 34 clinical variables as input **(Supplementary**  
254 **Table 3a)**. The data were split into training (75%) and validation (25%) sets, and model  
255 performance was evaluated on the latter. The greatest average AUC achieved was 0.62 (SD  
256 0.04) using a random forest model **(Supplementary Table 3b)**. We then computed the AUC  
257 using the qSOFA score, a widely used clinical score for sepsis diagnosis<sup>15</sup>. The qSOFA  
258 achieved an average AUC of 0.48 (SD 0.02).

259

260 **Discussion**

261 Sepsis is defined as a dysregulated host response to infection<sup>15</sup>, yet existing diagnostics

262 have focused exclusively on either detecting pathogens or assessing features of the infected  
263 host. Here, we combined host transcriptional profiling with broad-range pathogen detection to  
264 accurately diagnose sepsis in critically ill patients upon hospital admission. Further, we  
265 demonstrate that an integrated host-microbe metagenomics approach can be performed on  
266 circulating RNA and DNA from plasma, a widely available clinical specimen type with previously  
267 unrecognized utility for host-based infectious disease diagnosis.

268 Identifying an etiologic pathogen is critical for optimal treatment of sepsis. We found that  
269 concordance between pathogen detection by plasma mNGS and traditional bacterial blood  
270 culture varied by organism. For instance, mNGS sensitivity for detecting *S. aureus* and *E. coli*,  
271 two of the most globally important sepsis pathogens<sup>5</sup>, was 100%. In contrast, mNGS missed  
272 several important but less common sepsis pathogens, such as *S. pyogenes*. We noted that in all  
273 false-negative cases, the patients had received antibiotics prior to mNGS sample collection,  
274 which may have reduced the abundance of circulating bacterial DNA available for detection.  
275 Furthermore, mNGS and blood cultures were performed on different samples, with research  
276 specimens collected up to 24 hours after blood cultures, which may have resulted in lower  
277 concordance than if samples had been collected contemporaneously.

278 Several of the microbes missed by mNGS were organisms that in many contexts exist  
279 as commensals (e.g., *Fusobacterium*, *Gemella* and *Streptococcus* species). It is unclear  
280 whether these organisms were truly etiologic sepsis pathogens or commensals translocated to  
281 the blood in the setting of critical illness, and incidentally identified in culture. *Clostridium*  
282 species are frequently found as contaminants in blood cultures<sup>23</sup>, which is perhaps why mNGS  
283 also did not detect an unspiciated *Clostridium* isolated in blood culture from one patient.

284 With respect to non-BSI sepsis, our findings suggest that plasma mNGS may be most  
285 useful for identifying UTI-associated pathogens, although we also observed some utility for  
286 respiratory pathogen detection, in line with a prior report<sup>24</sup>. mNGS failed to detect *C. difficile* in  
287 any patients with colitis from this pathogen, although this is not surprising given that the

288 organism is rarely associated with bacteremia<sup>25</sup>.

289         Within the No-Sepsis group, 10/37 (27%) of patients had a pathogen detected by  
290 mNGS, each of which was validated to be present at statistically significantly higher levels than  
291 in background controls. Notably, 9/10 (90%) of the pathogens were gram negative enteric  
292 organisms, which may reflect gastrointestinal translocation of microbes, a well described  
293 phenomenon during critical illness<sup>26</sup>. In addition, all 10 of these patients had received antibiotics  
294 in the first day of study enrollment, so it is possible that sequences derived from non-viable  
295 organisms unable to grow in culture.

296         Plasma RNA sequencing alone performed poorly for detecting sepsis-associated  
297 respiratory viruses. Incorporation of a host-based viral classifier, however, markedly improved  
298 detection of clinically confirmed viral LRTI. The viral classifier predicted previously unrecognized  
299 viral infections in three patients with sepsis who did not undergo viral PCR testing during their  
300 hospitalizations. Prior work has demonstrated that different viral species elicit distinct host  
301 transcriptional signatures in the peripheral blood<sup>27</sup>, suggesting that future studies could extend  
302 the RNA host viral classifier to identify specific viral pathogens, such as influenza or SARS-CoV-  
303 2, for which therapeutics exist. Future studies could additionally explore the use of targeted  
304 enrichment methods<sup>28,29</sup> to enhance detection of viral sepsis pathogen nucleic acid.

305         In line with prior reports<sup>13</sup>, we found that viral sepsis has a unique host transcriptional  
306 signature characterized by expression of interferon and other signaling pathways. We also  
307 observed transcriptional differences based on whether sepsis was due to a bloodstream versus  
308 peripheral site infection, which was less expected. The host response in Sepsis<sup>BSI</sup> patients was  
309 characterized by lower expression of genes related to CD28 signaling and T cell activation, and  
310 greater expression of genes related to antimicrobial peptides, defensins and G alpha signaling,  
311 compared to Sepsis<sup>non-BSI</sup> patients.

312         We found that detection of a pathogen alone was in many cases insufficient for sepsis  
313 diagnosis, but when combined with a host transcriptional profile, had promising diagnostic utility

314 and potential as a tool for infection rule-out. In addition to defining host signatures of sepsis  
315 from whole blood, we also found biologically relevant host transcripts in plasma. This may have  
316 direct clinical applications given that plasma mNGS is increasingly being used in hospitals for  
317 pathogen detection in patients with sepsis and other infectious diseases, with turnaround times  
318 of  $\leq 48$  hours.

319 Inappropriate antimicrobial use is a major challenge in the management of critical illness,  
320 and is often driven by the inability to rule-out infection in patients with systemic inflammatory  
321 diseases. Indeed, we found that clinical variables alone, including the qSOFA score, were  
322 unable to accurately distinguish patients with sepsis from those with non-infectious critical  
323 illnesses at the time of initial evaluation in the ED. In contrast, our proof-of-concept assessment  
324 of the integrated host + microbe mNGS model demonstrated 99% sensitivity across patients  
325 with microbiologically confirmed sepsis, and 78% specificity within the No-Sepsis group, which  
326 was comprised almost entirely of patients meeting the clinical definition of systemic  
327 inflammatory response syndrome<sup>16</sup>.

328 Host/microbe mNGS may facilitate precision antimicrobial stewardship by discriminating  
329 sepsis from diverse types of non-infectious febrile inflammatory syndromes, ranging from  
330 autoimmune diseases to macrophage activation syndrome. We envision this assay being used  
331 at the time of ED presentation for all suspected sepsis patients, as an adjunct to blood cultures  
332 and other traditional microbiological testing.

333 Distinguishing true sepsis pathogens from environmental contaminants or human  
334 commensals (e.g., *Gemella*), is a challenge for both mNGS and traditional culture-based  
335 microbiologic methods. Concomitant assessment of a host-based metric offers an opportunity to  
336 determine whether the detected pathogen exists in the context of an immunological state  
337 consistent with infection. Considering this, host/microbe mNGS diagnostic classification could  
338 theoretically be more difficult in immunocompromised patients. Arguing against this, however, is  
339 prior work demonstrating accurate performance of a host/microbe mNGS pneumonia diagnostic

340 in an ICU cohort with a 40% prevalence of immunocompromised individuals<sup>14</sup>.

341 Our study has several strengths, including the novel use of plasma RNA transcriptomics  
342 for sepsis diagnosis, development of the first sepsis diagnostic combining host and microbial  
343 mNGS data, detailed clinical phenotyping, and a large prospective cohort of critically ill adults  
344 with systemic illnesses. It also has some limitations. First, as noted above, mNGS and blood  
345 cultures were performed on different samples collected at different times, so the observed  
346 concordance with clinical microbiological testing may be an underestimate. Second, a significant  
347 fraction of plasma samples had insufficient host transcripts to permit gene expression analyses,  
348 leading to a smaller sample size for the plasma versus the whole blood cohorts. This limitation  
349 may be addressable in future studies by increasing the input plasma volume and thus RNA  
350 mass.

351 The host immune response during sepsis is dynamic, and thus the stage of infection at  
352 which gene expression is measured may influence accuracy of the classifier. While our study  
353 was cross-sectional in design, we attempted to control for this by sampling at a consistently  
354 early stage of critical illness, within the first 24 hours of ICU admission. Lastly, because we did  
355 not have access to any other sepsis studies with either plasma gene expression data or paired  
356 host and microbial mNGS data from blood, additional studies in an independent cohort will be  
357 needed to validate these findings.

358 In conclusion, we report that combining host gene expression profiling and metagenomic  
359 pathogen detection from plasma nucleic acid enables accurate diagnosis of sepsis. Future  
360 studies are needed to validate and test the clinical impact of this culture-independent diagnostic  
361 approach.



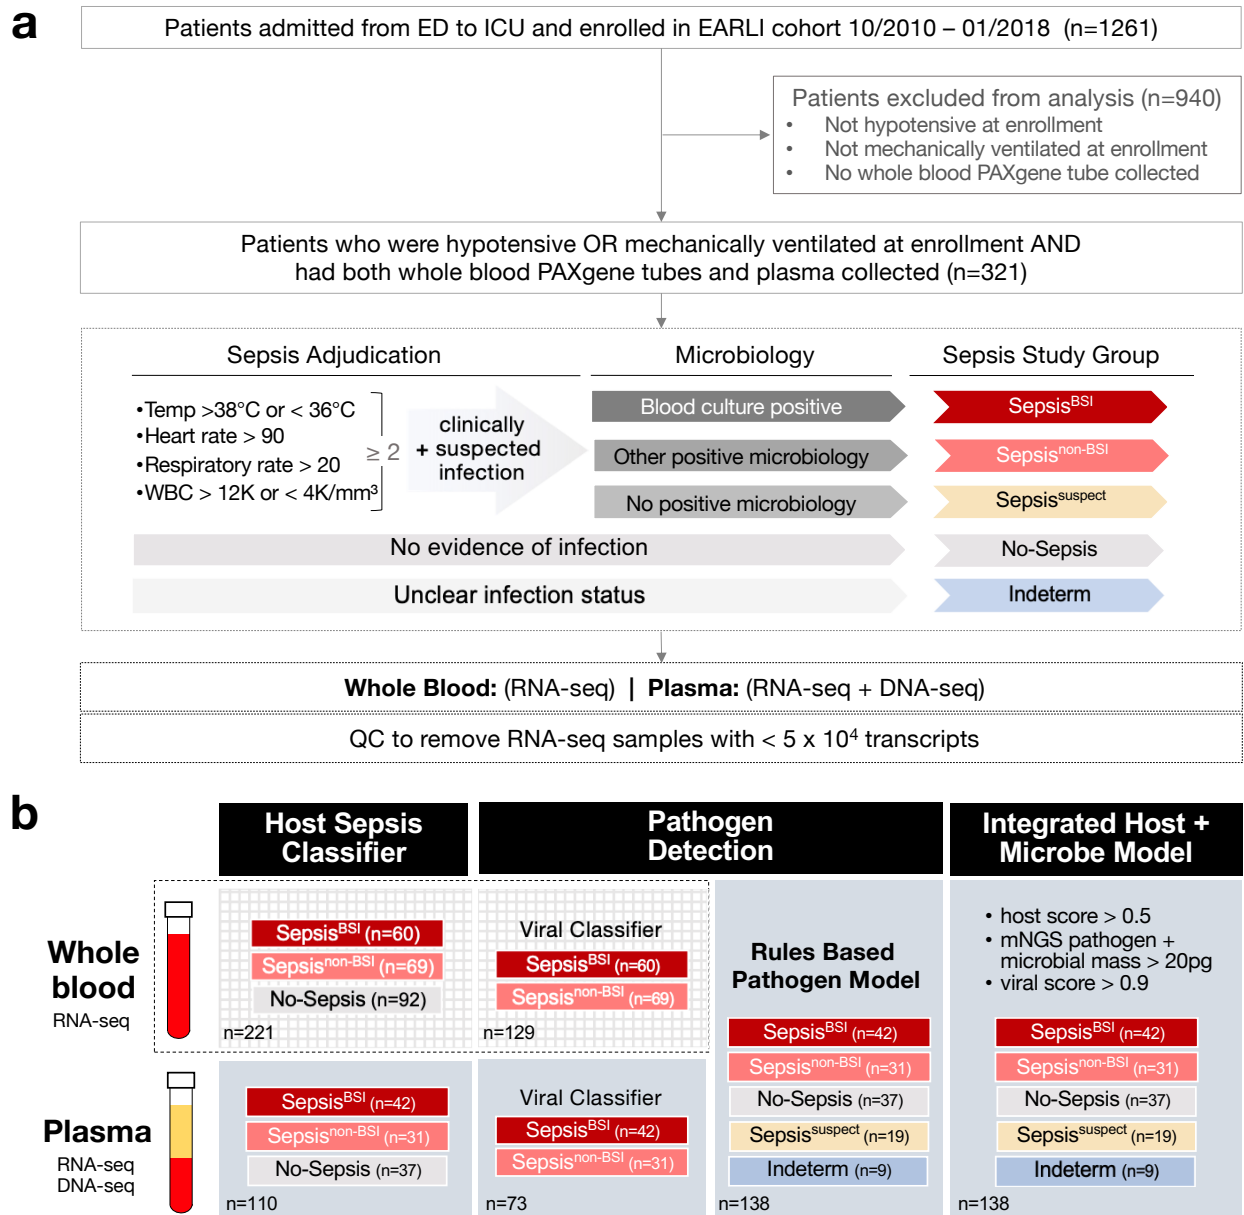

362

363 **Figure 1. a)** Study flow diagram. Patients studied were enrolled in the Early Assessment of Renal  
 364 and Lung Injury (EARLI) cohort. Sepsis adjudication performed following hospital discharge was  
 365 based on ≥ 2 or systemic inflammatory response syndrome (SIRS) criteria plus clinical suspicion  
 366 of infection, and was used to delineate 5 patient subgroups. Following quality control (QC), whole  
 367 blood underwent RNA-seq and plasma underwent RNA-seq and DNA-seq. **b)** Analytic  
 368 approaches. Host transcriptional sepsis diagnostic classifiers were trained and tested on RNA-  
 369 seq data from whole blood (n=221) and plasma (n=110), with a goal of differentiating patients with  
 370 microbiologically confirmed sepsis (Sepsis<sup>BSI</sup> + Sepsis<sup>non-BSI</sup>) from those without clinical evidence  
 371 of infection (No-Sepsis). Viral infections were identified via a secondary host transcriptomic  
 372 classifier. Sepsis pathogens were detected from plasma nucleic acid using metagenomic next  
 373 generation sequencing (mNGS) followed by a rules-based bioinformatics model (RBM). Finally,  
 374 an integrated host + microbe model for sepsis diagnosis was developed and evaluated.

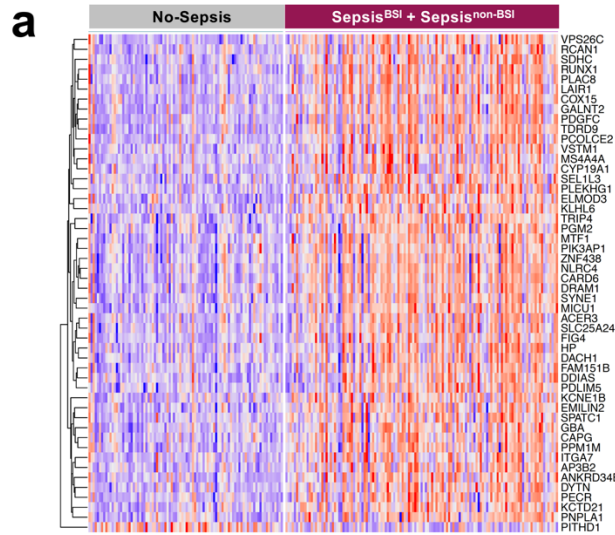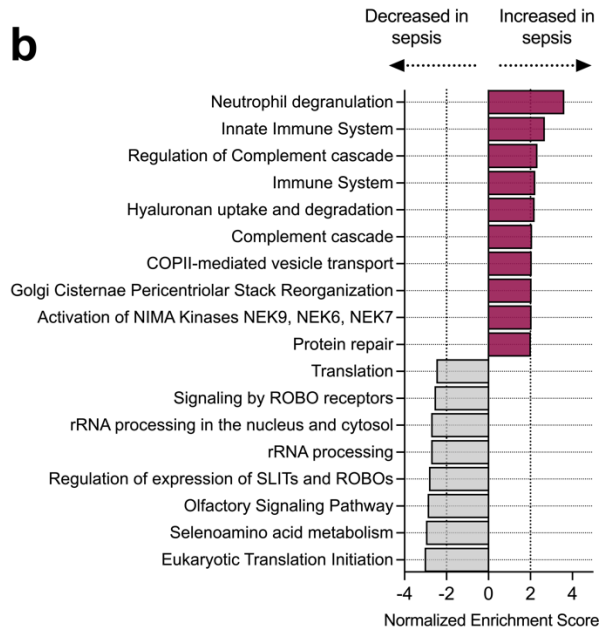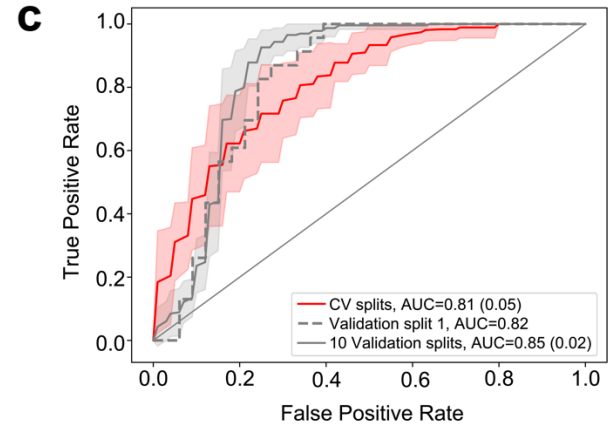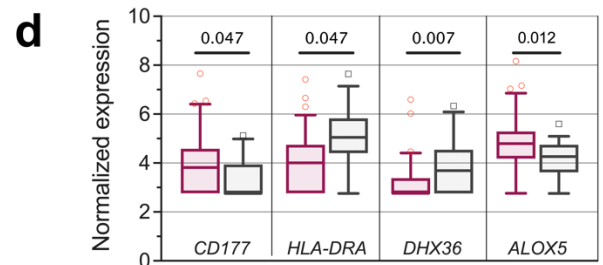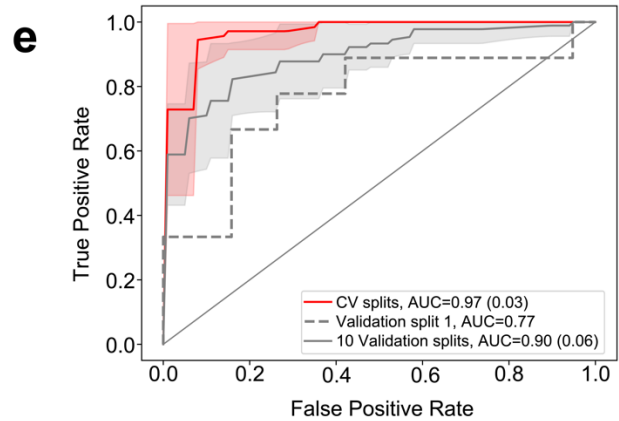

376 **Figure 2.** Host gene expression differentiates patients with sepsis from those with non-infectious  
377 critical illnesses. **a)** Heatmap of top 50 differentially expressed genes from whole blood  
378 transcriptomics comparing patients with microbiologically confirmed sepsis (Sepsis<sup>BSI</sup> + Sepsis<sup>non-</sup>  
379 <sup>BSI</sup>) versus those without evidence of infection (No-Sepsis). **b)** Gene set enrichment analysis of  
380 the differentially expressed genes with the top 10 up- and down-regulated pathways ( $P < 0.05$ )  
381 highlighted. **c)** Receiver operating characteristic (ROC) curve demonstrating performance of  
382 bagged support vector machine (bSVM) classifier for sepsis diagnosis from whole blood  
383 transcriptomics ( $n=221$ ). The area under the ROC curve (AUC) and standard deviation (SD, in  
384 parentheses, when applicable) are listed in the figure panel for cross validation (CV) in the training  
385 set (red line: average over 10 random splits; red shaded area:  $\pm 1SD$ ), the held-out validation set  
386 (dashed grey line), and over 10 randomly-generated validation sets (solid grey line: average; grey  
387 shaded area:  $\pm 1SD$ ). **d)** Plasma RNA-seq expression differences of selected differentially  
388 expressed genes previously identified as sepsis biomarkers, with Sepsis patients in maroon, and  
389 No-Sepsis patients in grey. Adjusted P value provided above boxplot. Boxes represent the 25-75  
390 percentiles and whiskers represent the 5-95 percentiles. **e)** ROC curve demonstrating  
391 performance of bSVM classifier for sepsis diagnosis from plasma RNA ( $n=110$ ). The AUC and  
392 SD are listed in the figure panel for CV in the training set (red line: average over 10 random splits;  
393 red shaded area: average  $\pm 1SD$ ), the held-out validation set (dashed grey line), and over 10  
394 randomly-generated validation sets (solid grey line: average; grey shaded area: average  $\pm 1SD$ ).

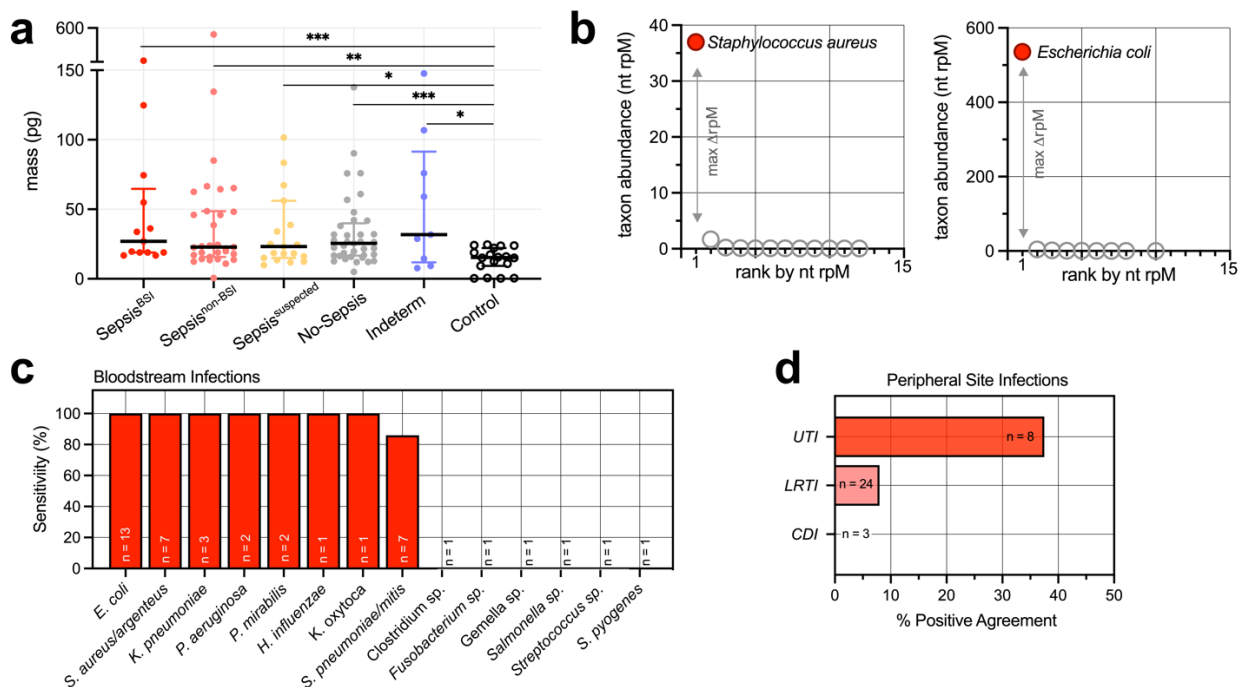

395

396 **Figure 3.** Plasma metagenomic next generation sequencing (mNGS) for detecting sepsis  
397 pathogens. **a)** Microbial plasma DNA mass differences between sepsis groups. Black bars  
398 represent median and error bars represent the interquartile range. **b)** Graphical depiction of the  
399 rules-based model (RBM) for sepsis pathogen detection from two different exemplary cases. The  
400 RBM identifies established pathogens with disproportionately high abundance compared to other  
401 commensal and environmental microbes in the sample. **c)** Concordance between plasma DNA  
402 mNGS for detecting bacterial pathogens in Sepsis<sup>BSI</sup> patients with bacterial bloodstream  
403 infections compared to a gold standard of culture. **d)** Sensitivity of plasma nucleic acid mNGS for  
404 detecting pathogens in Sepsis<sup>non-BSI</sup> patients with sepsis from non-bloodstream, peripheral sites  
405 of infection. Legend: LRTI = lower respiratory tract infection; UTI = urinary tract infection; CDI =  
406 *Clostridium difficile* infection. Mass data are tabulated in Supplementary Data 8. Clinical  
407 microbiology and metagenomics data are tabulated in Supplementary Data 9. \*\*\* =  $P \leq 0.001$ , \*\*  
408 =  $P \leq 0.01$ , \* =  $P \leq 0.05$ .

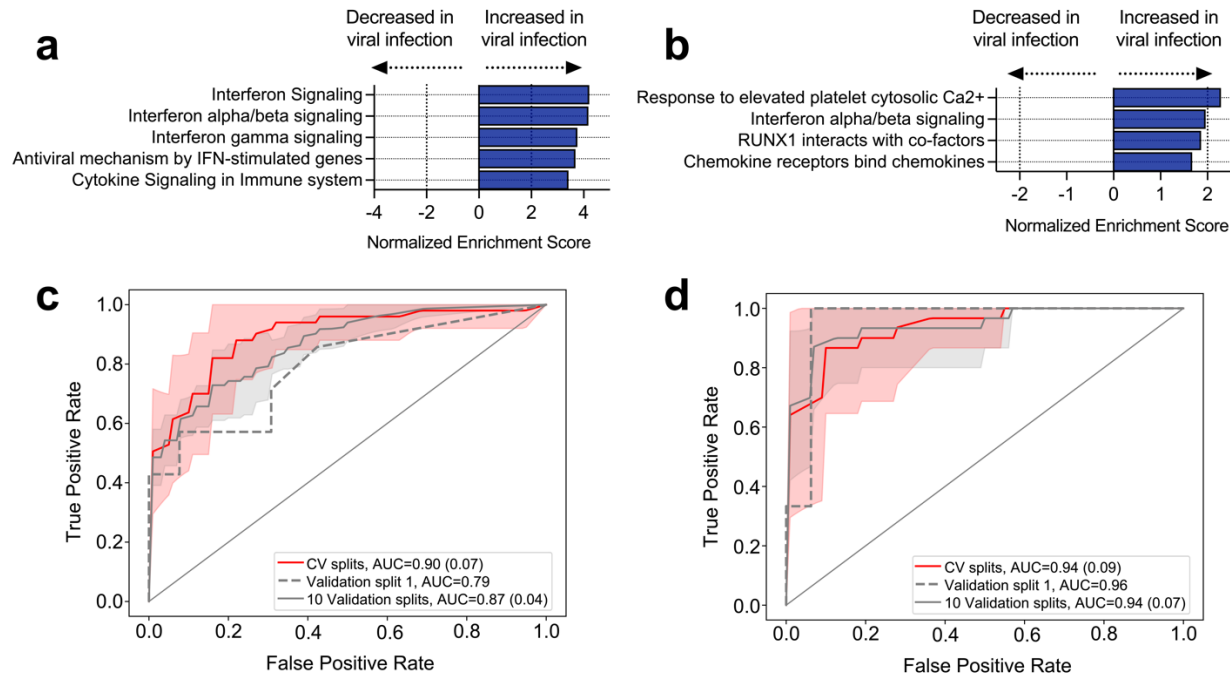

409

410 **Figure 4.** Detection of viral sepsis based on host gene expression. **a)** GSEA of differentially  
 411 expressed genes from whole blood RNA-seq (n=129) demonstrating pathways enriched in  
 412 patients with viral sepsis. Gene sets with  $P < 0.05$  included. **b)** GSEA of differentially expressed  
 413 genes from plasma RNA-seq (n=73) demonstrating pathways enriched in patients with viral  
 414 sepsis. Gene sets with  $P < 0.05$  included. **c)** ROC curve demonstrating performance of bagged  
 415 support vector machine (bSVM) classifier for detecting viral sepsis from whole blood RNA-seq  
 416 (n=129). The area under the ROC curve (AUC) and standard deviation (SD, in parentheses, when  
 417 applicable) are listed in the figure panel for cross validation (CV) in the training set (red line:  
 418 average over 10 random splits; red shaded area:  $\pm 1SD$ ), the held-out validation set (dashed grey  
 419 line), and over 10 randomly generated validation sets (solid grey line: average; grey shaded area:  
 420  $\pm 1SD$ ). **d)** ROC curve demonstrating performance of bSVM classifier for detecting viral sepsis  
 421 from plasma RNA-seq (n=73). The AUC and SD are listed in the figure panel for CV in the training  
 422 set (red line: average over 10 random splits; red shaded area:  $\pm 1SD$ ), the held-out validation set  
 423 (dashed grey line), and over 10 randomly generated validation sets (solid grey line: average; grey  
 424 shaded area:  $\pm 1SD$ ).

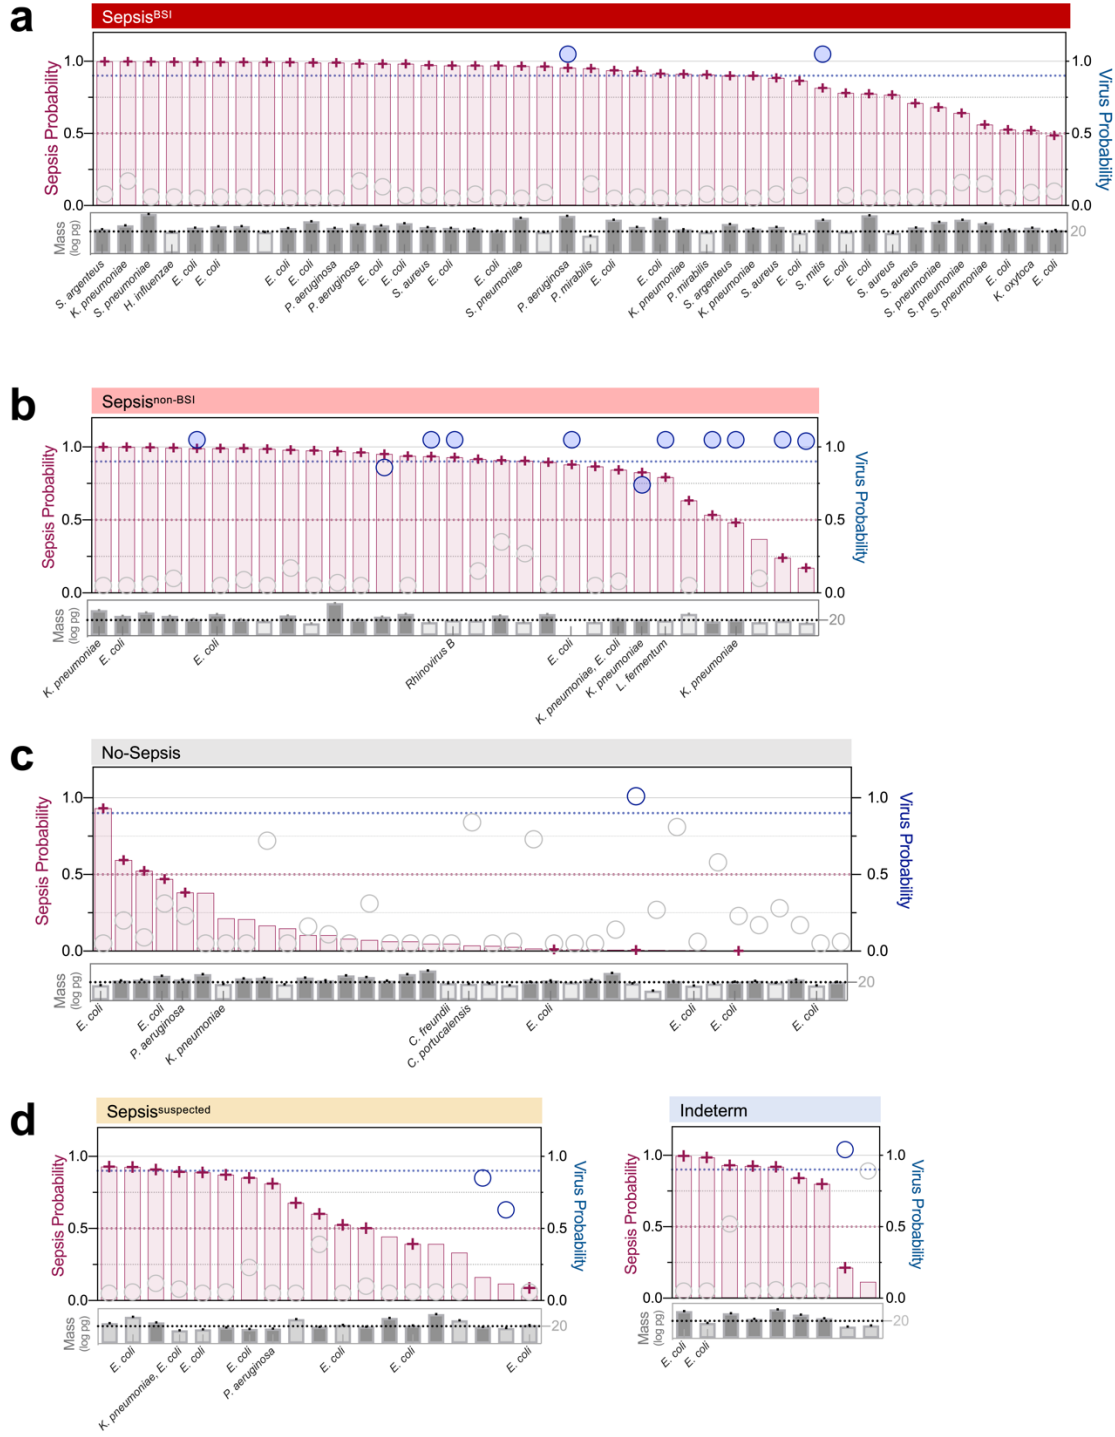

425

426 **Figure 5.** Integrated host-microbe mNGS model for sepsis diagnosis from plasma. Host criteria  
427 for positivity can be met by a sepsis transcriptomic classifier probability > 0.5 (maroon bars,  
428 dotted line). Microbial criteria can be met based on either: 1) detection of a pathogen by mNGS  
429 *and* a sample microbial mass > 20 pg (grey bars), or 2) viral transcriptomic classifier probability  
430 > 0.9 (blue circles, dotted line). Host and microbial metrics are highlighted for patients with  
431 sepsis due to **a)** bloodstream infections (Sepsis<sup>BSI</sup>), **b)** peripheral infection (Sepsis<sup>non-BSI</sup>), **c)**  
432 patients with non-infectious critical illness (No-Sepsis), and **d)** patients with suspected sepsis  
433 but negative microbiological testing (Sepsis<sup>suspected</sup>) and patients with indeterminant sepsis  
434 status (Indeterm). Maroon cross: sepsis positive based on model. Blue circles: virus predicted  
435 from plasma RNA secondary viral host classifier. Filled blue circles = virus also detected by  
436 clinical respiratory viral PCR. Cases with < 20pg microbial mass indicated by lighter grey  
437 shading. Samples with mNGS-detected pathogens have the microbe(s) listed below the sample  
438 microbial mass. Raw values for plots and original training/test split assignments are tabulated in  
439 Supplementary Data 16.

## 440 **Methods**

### 441 Study design, clinical cohort, and ethics statement

442 We conducted a prospective observational study of patients with acute critical illnesses  
443 admitted from the ED to the ICU. We studied patients who were enrolled in the Early  
444 Assessment of Renal and Lung Injury (EARLI) cohort at the University of California, San  
445 Francisco (UCSF) or Zuckerberg San Francisco General Hospital between 10/2010 and  
446 01/2018 (**Supplementary Table 1**). The study was approved by the UCSF Institutional Review  
447 Board (IRB) under protocol 10-02852, which granted a waiver of initial consent for blood  
448 sampling. Informed consent was subsequently obtained from patients or their surrogates for  
449 continued study participation, as previously described<sup>30,31</sup>.

450 For the parent EARLI cohort, the inclusion criteria are: 1) age  $\geq$  18, 2) admission to the  
451 ICU from the ED, and 3) enrollment in the ED or within the first 24 hours of ICU admission. For  
452 this study, we selected patients for whom PAXgene whole blood tubes and matched plasma  
453 samples from the time of enrollment were available. PAXgene tubes were collected on patients  
454 enrolled in EARLI during the time period listed above who were hypotensive and/or  
455 mechanically ventilated at the time of enrollment. The main exclusion criteria for the EARLI  
456 study are: 1) exclusively neurological, neurosurgical, or trauma surgery admission, 2) goals of  
457 care decision for exclusively comfort measures, 3) known pregnancy, 4) legal status of prisoner,  
458 and 5) anticipated ICU length of stay  $<$  24 hours. Enrollment in EARLI began in 10/2008 and  
459 continues.

### 460 Sepsis adjudication

461 Clinical adjudication of sepsis groups was carried out by study team physicians (MA, CL,  
462 AL, KL, PS, CH, AG, CC, KK, MM) using the sepsis-2 definition<sup>32</sup> ( $\geq$  2 SIRS criteria + suspected  
463 infection) and incorporating all available clinical and microbiologic data from the entire ICU  
464 admission, with blinding to mNGS results. Each patient was reviewed by at least four



465 physicians. Disagreements were handled by discussion with the most senior physicians (CC,  
466 MM) in the phenotyping panel. Patients were categorized into five subgroups based on sepsis  
467 status (**Figure 1a, Supplementary Figure 1**). Patients with clinically adjudicated sepsis and a  
468 bacterial culture-confirmed bloodstream infection (Sepsis<sup>BSI</sup>), sepsis due to a microbiologically  
469 confirmed primary infection at a peripheral site other than the bloodstream (Sepsis<sup>non-BSI</sup>),  
470 suspected sepsis with negative clinical microbiologic testing (Sepsis<sup>suspected</sup>), patients with no  
471 evidence of sepsis and a clear alternative explanation for their critical illness (No-Sepsis), or  
472 patients of indeterminant status (Indeterm). Clinical and demographic features of patients are  
473 summarized in (**Supplementary Table 1**) and tabulated in (**Supplementary Data 16 and 17**).

#### 474 Metagenomic sequencing

475       Following enrollment, whole blood and plasma were collected in PAXgene and EDTA  
476 tubes, respectively. Whole blood PAXgene tubes were processed and stored at -80C according  
477 to manufacturer's instructions, and plasma was frozen at -80C within two hours. To evaluate  
478 host gene expression and detect microbes, RNA-seq was performed on the whole blood and  
479 plasma specimens, and DNA-seq was performed on plasma specimens. RNA was extracted  
480 from whole blood using the Qiagen RNeasy kit and normalized to 10ng total input per sample.  
481 Total plasma nucleic acid was extracted by first clarifying 300uL of plasma via maximum-speed  
482 centrifugation for five minutes at 21,300 x g, and then employing the Zymo Pathogen Magbead  
483 Kit on the supernatant following manufacturer's instructions. 10ng of total nucleic acid  
484 underwent DNA-seq using the NEBNext Ultra II DNA Kit. Samples with at least 10ng of  
485 remaining total nucleic acid were treated with DNase (Qiagen) to recover RNA, and then  
486 underwent RNA-seq library preparation using the NEBNext Ultra II RNA-seq Kit as described  
487 below.

488       For RNA-seq library preparation, human cytosolic and mitochondrial ribosomal RNA and  
489 globin RNA was first depleted using FastSelect (Qiagen). For the purposes of background

490 contamination correction (see below) and to enable estimation of input microbial mass, we  
491 included negative water controls as well as positive controls (spike-in RNA standards from the  
492 External RNA Controls Consortium (ERCC))<sup>33</sup>. RNA was then fragmented and underwent library  
493 preparation using the NEBNext Ultra II RNA-seq Kit (New England Biolabs) according to  
494 described methods. Finished libraries underwent 146 nucleotide paired-end Illumina  
495 sequencing on an Illumina Novaseq 6000 instrument.

496 Index swapping can lead to read misassignment with Illumina sequencing. Dual  
497 indexing, that is adding barcode index sequences on both ends of the molecule, reduces the  
498 rate at which this misassignment occurs by requiring concordance between the two barcode  
499 sequences. The frequency of index-swapped reads has been estimated to be more than 35X  
500 lower when using dual vs single indexing<sup>35</sup>. Because we used dual indexing and because the  
501 RBM for pathogen detection operates by only identifying pathogen sequences  
502 disproportionately abundant in a sample versus the other sequences, our methods would not be  
503 expected to be negatively influenced by index swapping, which would only be anticipated to  
504 misassign low abundance reads irrelevant to the RBM.

#### 505 Host differential expression and pathway analysis

506 Following demultiplexing, sequencing reads were aligned with STAR<sup>36</sup> to an index  
507 consisting of all transcripts associated with human protein coding genes (ENSEMBL v. 99),  
508 cytosolic and mitochondrial ribosomal RNA sequences, and the sequences of ERCC RNA  
509 standards. Samples retained in the dataset had a total of at least 50,000 counts associated with  
510 transcripts of protein coding genes.

511 Differential expression analysis was performed using DESeq2 and including covariates  
512 for age and gender. Significant genes were identified using an independent-hypothesis-  
513 weighted, Benjamini-Hochberg false discovery rate (FDR) < 0.1<sup>38,39</sup>. We generated heatmaps of  
514 the top 50 differentially expressed genes by absolute log<sub>2</sub>-fold change. To evaluate signaling

515 pathways from gene expression data, we employed gene set enrichment analysis using  
516 WebGestalt<sup>40</sup> on all ranked differentially expressed genes with a P value < 0.1. Significant  
517 pathways and upstream regulators were defined as those with a gene set P value < 0.05.

#### 518 Pathogen detection

519 Detection of microbes leveraged the open-source IDseq pipeline<sup>22</sup> which incorporates  
520 subtractive alignment of the human genome (NCBI GRC h38) using STAR<sup>36</sup>, quality and  
521 complexity filtering, and subsequent removal of cloning vectors and phiX phage using  
522 Bowtie2<sup>22</sup>. The identities of the remaining microbial reads are determined by querying the NCBI  
523 nucleotide (NT) database using GSNAP-L<sup>22,41</sup>. After background correction (see below),  
524 retained non-viral taxonomic alignments in each sample were aggregated at the genus level,  
525 and sorted in descending order by abundance measured in reads per million (rpM),  
526 independently for each sample. A previously validated rules based model (RBM)<sup>14</sup> was then  
527 utilized to identify disproportionately abundant bacteria and fungi in each sample, and flag them  
528 as pathogens. The RBM, originally developed to identify pathogens from respiratory mNGS  
529 data, detects outlier organisms within a sample by identifying the greatest gap in abundance  
530 between the top 15 sequentially ranked microbes in each sample. All microbes present in a  
531 reference index of established pathogens above this gap are then called by the RBM.

532 We adapted the original RBM specifically for sepsis pathogen detection, in which outlier  
533 organisms are sometimes present in low abundance, by incorporating a sepsis (as opposed to  
534 respiratory) pathogen reference index (**Supplementary Data 18**) and requiring that the species  
535 called by the RBM both be present in the reference index and detected at an abundance of > 1  
536 rpM. Given the potential for respiratory viruses to cause sepsis, the RBM also identified human  
537 pathogenic respiratory viruses derived from a reference list of LRTI pathogens<sup>14</sup>, present in the  
538 plasma RNA-seq data at an abundance of > 1 rpM. Sensitivity and specificity were calculated  
539 based on detection of reference index sepsis pathogens in each of the sepsis adjudication

540 groups.

541 The reference index (**Supplementary Data 18**) was established *a. priori* and no data  
542 from the enrolled patients were used to inform the distinction between pathogens and  
543 commensals. The index consisted of the most prevalent bloodstream infection pathogens  
544 reported by both the National Healthcare Safety Network (NHSN)<sup>42</sup> and a recent multicenter  
545 surveillance study of healthcare-associated infections<sup>43</sup>. These studies reported multiple species  
546 of Bacteriodes, Candida, Citrobacter, Enterobacter, Enterococcus, Klebsiella, Lactobacillus,  
547 Morganella, Prevotella, Proteus, Serratia, Stenotrophomonas and Streptococcus as common  
548 sepsis pathogens, and thus the reference index contains all species within these genera,  
549 yielding > 1000 total species detectable by the model based on current NCBI taxonomy.

#### 550 Identification and mitigation of environmental contaminants

551 Negative control samples consisting of only double-distilled water (n=24) were  
552 processed alongside plasma DNA samples, which were sequenced in a single batch. Negative  
553 control samples enabled estimation of the number of background reads expected for each  
554 taxon<sup>44</sup>. A previously developed negative binomial model<sup>44</sup> was employed to identify taxa with  
555 NT sequencing alignments present at an abundance significantly greater compared to negative  
556 water controls. This was done by modeling the number of background reads as a negative  
557 binomial distribution, with mean and dispersion fitted on the negative controls. For each taxon,  
558 we estimated the mean parameter of the negative binomial by averaging the read counts across  
559 all negative controls. We estimated a single dispersion parameter across all taxa, using the  
560 functions `glm.nb()` and `theta.md()` from the R package MASS<sup>45</sup>. Taxa that achieved an adjusted  
561 P value <0.01 (Benjamini & Hochberg multiple test correction) were carried forward to the  
562 above-described RBM for pathogen detection.

563 Microbial mass calculations

564 Microbial mass was calculated based on the ratio of microbial reads in each sample to  
565 total reads aligning to the External RNA Controls Consortium (ERCC) RNA standards spiked  
566 into each sample<sup>46</sup>. The following equation was utilized for this calculation: [ERCC input  
567 mass]/[microbial input mass] = [ERCC reads]/[microbial reads], where the ERCC input mass  
568 was 25pg.

569 Host transcriptional classifiers for sepsis and viral infection diagnosis

570 To build classifiers that differentiated patients with sepsis (Sepsis<sup>BSI</sup>, Sepsis<sup>non-BSI</sup>) from  
571 those with non-infectious critical illness (No-Sepsis), and distinguished viral from non-viral  
572 sepsis, we built a Support Vector Machine (SVM)-based classifier<sup>47</sup> with the scikit-learn<sup>48</sup>  
573 (v0.23.2) library in Python (v3.8.3). We tested several machine learning approaches (bagged  
574 SVM, random forest and gradient boosted trees) and selected a bSVM classifier with a linear  
575 kernel based on best performance (**Supplementary Table 2**). Each classifier used a  
576 bootstrapped set of samples and a random subset of features.

577 We evaluated samples with  $\geq 50,000$  plasma gene counts and genes with more than  
578 20% non-zero counts in that sample subset. Only differentially expressed genes, identified using  
579 DESeq2 (v1.28.1) in the training set, were considered as potential predictors and included in  
580 machine learning models, with FDR thresholds of 0.1 (whole blood), 0.2 (plasma, viral) and 0.3  
581 (plasma, sepsis) chosen based on cross-validation. Age and sex were included as covariates in  
582 the models. We used Z-score-scaled transformed (variance stabilizing transformation) gene  
583 counts. 75% of the data was selected to train the model, and the rest was used as a held-out  
584 set to test the final model. The training set was subsequently randomly split ten times for cross-  
585 validation, using 75% of each as intermediate training sets, and the remaining 25% as their  
586 associated testing sets.

587 On each one of those intermediate training sets, we carried out feature selection and  
588 parameters optimization using nested 5-fold cross-validations. We optimized three parameters:  
589 the regularization parameter, the maximum number of features considered for each classifier,  
590 and the total number of classifiers to use for bagging. For each parameters optimization fold, a  
591 recursive feature elimination (RFE) strategy was adopted, dropping 10% of the remaining least  
592 important features at each iteration. A bSVM classifier with default parameters was built at each  
593 iteration. We defined feature importance as the average squared weight across all estimators.  
594 To maximize interpretability, we restricted the maximum number of predictors to 100 genes.

595 We estimated model performances using the Area Under the Receiver Operating  
596 Characteristic Curve (AUC) values. To obtain a single set of features, we fitted a model, using  
597 the aforementioned strategy, to the initial training set. This model was then tested on the held-  
598 out set to obtain a final performance value and a single set of predictors.

#### 599 Comparison of plasma nucleic acid mNGS against clinician-ordered diagnostic testing

600 Clinical microbiological testing was carried out based on decisions from the primary  
601 medical team during the patient's hospital admission at the UCSF and ZSFG clinical  
602 microbiology laboratories. Tests utilized included bacterial culture from blood, lower respiratory  
603 tract and urine which were carried out according to previously described protocols<sup>14</sup>. Clinical  
604 testing for viral respiratory pathogens was performed from nasopharyngeal swabs and/or  
605 bronchioalveolar lavage using the Luminex XTag multiplex viral PCR assay. Polymicrobial blood  
606 cultures with  $\geq 3$  bacteria (n=2) were excluded from pathogen concordance given their unclear  
607 clinical significance and potential that some organisms reflected contamination.

#### 608 Integrated host + microbe sepsis diagnosis and rule-out model

609 We developed a simple integrated host + microbe model that returned a sepsis diagnosis based  
610 on either host criteria [host sepsis classifier probability > 0.5] or microbial criteria:  
611 [(pathogen detected by RBM) AND (microbial mass > 20 pg)] OR [host viral classifier

612 probability > 0.9]. Combined metrics (**Supplementary Data 16**) including sepsis assignment  
613 based on this model are depicted in Figure 5. Sensitivity was calculated in the (Sepsis<sup>BSI</sup>) and  
614 (Sepsis<sup>non-BSI</sup>) groups, and specificity in the (No-Sepsis) group.

615

#### 616 Clinical variable models for sepsis diagnosis

617 We tested the ability of clinical variables (**Supplementary Table 3a**) available at the  
618 time of initial patient assessment to predict sepsis using three machine learning methods. These  
619 included SVM using the e1071 package<sup>49</sup>, random forest using the randomForest package<sup>50</sup>  
620 and regularized logistic regression using the glmnet<sup>51</sup> package in R version 4.2.0<sup>52</sup>. Specifically,  
621 we built models to classify Sepsis (Sepsis<sup>BSI</sup> and Sepsis<sup>non-BSI</sup>) versus No-Sepsis using 34  
622 clinical variables that would be available at the time of ED evaluation. The data were split into  
623 training (75%) and test (25%) sets and model performance (AUC) was evaluated on the test set.  
624 This was repeated for a total of 10 randomized splits with the AUC computed at each iteration.  
625 AUC was also computed for the qSOFA score (systolic blood pressure < 100 mmHg, respiratory  
626 rate > 22 breaths/minute, Glasgow Coma Scale < 13). Results are tabulated in (**Supplementary**  
627 **Table 3b**).

#### 628 Statistics and reproducibility

629 Statistical tests utilized for each analysis are described in the figure legends and in  
630 further detail in each respective methods section. The number of patient samples analyzed for  
631 each comparison are indicated in the figure legends. Data were generated from single  
632 sequencing runs without technical replicates.

#### 633 Data availability

634 Source data are provided with this paper. The processed gene count data are available  
635 from the National Center for Biotechnology Information Gene Expression Omnibus database  
636 under accession code GSE189403. The raw sequencing data are protected due to data privacy

637 restrictions from the IRB protocol governing patient enrollment, which protects the release of  
638 raw genetic sequencing data from those patients enrolled under a waiver of consent. To honor  
639 this, researchers who wish to obtain raw fastq files for the purposes of independently generating  
640 genecounts can contact the corresponding author ([chaz.langelier@ucsf.edu](mailto:chaz.langelier@ucsf.edu)) and request to be  
641 added to the IRB protocol. The raw fastq files with microbial sequencing reads are available  
642 from the Sequence Read Archive under BioProject ID: PRJNA783060.

643

#### 644 Code availability

645 Code for the differential expression, classifier development and RBM can be found at:  
646 ([https://github.com/lucile-n/plasma\\_classifiers](https://github.com/lucile-n/plasma_classifiers)).

647

#### 648 **References**

- 649 1. Rudd, K. E. *et al.* Global, regional, and national sepsis incidence and mortality, 1990–2017:  
650 analysis for the Global Burden of Disease Study. *The Lancet* **395**, 200–211 (2020).
- 651 2. Liu, V. *et al.* Hospital Deaths in Patients With Sepsis From 2 Independent Cohorts. *JAMA*  
652 **312**, 90 (2014).
- 653 3. Paul, M. *et al.* Systematic Review and Meta-Analysis of the Efficacy of Appropriate Empiric  
654 Antibiotic Therapy for Sepsis. *Antimicrob Agents Chemother* **54**, 4851–4863 (2010).
- 655 4. Ferrer, R. *et al.* Empiric Antibiotic Treatment Reduces Mortality in Severe Sepsis and Septic  
656 Shock From the First Hour: Results From a Guideline-Based Performance Improvement  
657 Program\*. *Critical Care Medicine* **42**, 1749–1755 (2014).
- 658 5. Novosad, S. A. *et al.* Vital Signs: Epidemiology of Sepsis: Prevalence of Health Care  
659 Factors and Opportunities for Prevention. *MMWR Morb. Mortal. Wkly. Rep.* **65**, 864–869  
660 (2016).



- 661 6. Lamy, B., Roy, P., Carret, G., Flandrois, J. & Delignette-Muller, M. L. What Is the Relevance  
662 of Obtaining Multiple Blood Samples for Culture? A Comprehensive Model to Optimize the  
663 Strategy for Diagnosing Bacteremia. *CLIN INFECT DIS* **35**, 842–850 (2002).
- 664 7. Baur, D. *et al.* Effect of antibiotic stewardship on the incidence of infection and colonisation  
665 with antibiotic-resistant bacteria and *Clostridium difficile* infection: a systematic review and  
666 meta-analysis. *The Lancet Infectious Diseases* doi:10.1016/S1473-3099(17)30325-0.
- 667 8. Wilson, M. R. *et al.* Clinical Metagenomic Sequencing for Diagnosis of Meningitis and  
668 Encephalitis. *N. Engl. J. Med.* **380**, 2327–2340 (2019).
- 669 9. Blauwkamp, T. A. *et al.* Analytical and clinical validation of a microbial cell-free DNA  
670 sequencing test for infectious disease. *Nature Microbiology* **4**, 663–674 (2019).
- 671 10. Lee, R. A., Al Dhaheri, F., Pollock, N. R. & Sharma, T. S. Assessment of the Clinical Utility  
672 of Plasma Metagenomic Next-Generation Sequencing in a Pediatric Hospital Population. *J*  
673 *Clin Microbiol* **58**, (2020).
- 674 11. Hogan, C. A. *et al.* Clinical Impact of Metagenomic Next-Generation Sequencing of Plasma  
675 Cell-Free DNA for the Diagnosis of Infectious Diseases: A Multicenter Retrospective Cohort  
676 Study. *Clinical Infectious Diseases* **72**, 239–245 (2021).
- 677 12. Sweeney, T. E. *et al.* A community approach to mortality prediction in sepsis via gene  
678 expression analysis. *Nat Commun* **9**, 694 (2018).
- 679 13. Tsalik, E. L. *et al.* Host gene expression classifiers diagnose acute respiratory illness  
680 etiology. *Science Translational Medicine* **8**, 322ra11-322ra11 (2016).
- 681 14. Langelier, C. *et al.* Integrating host response and unbiased microbe detection for lower  
682 respiratory tract infection diagnosis in critically ill adults. *Proc Natl Acad Sci USA* 201809700  
683 (2018) doi:10.1073/pnas.1809700115.
- 684 15. Singer, M. *et al.* The Third International Consensus Definitions for Sepsis and Septic Shock  
685 (Sepsis-3). *JAMA* **315**, 801 (2016).

- 686 16. Kaukonen, K.-M., Bailey, M., Pilcher, D., Cooper, D. J. & Bellomo, R. Systemic inflammatory  
687 response syndrome criteria in defining severe sepsis. *N. Engl. J. Med.* **372**, 1629–1638  
688 (2015).
- 689 17. Subramanian, A. *et al.* Gene set enrichment analysis: A knowledge-based approach for  
690 interpreting genome-wide expression profiles. *Proceedings of the National Academy of*  
691 *Sciences* **102**, 15545–15550 (2005).
- 692 18. Demaret, J. *et al.* Identification of CD177 as the most dysregulated parameter in a  
693 microarray study of purified neutrophils from septic shock patients. *Immunology Letters* **178**,  
694 122–130 (2016).
- 695 19. Tang, B. M. *et al.* Neutrophils-related host factors associated with severe disease and  
696 fatality in patients with influenza infection. *Nat Commun* **10**, 3422 (2019).
- 697 20. Cajander, S. *et al.* Preliminary results in quantitation of HLA-DRA by real-time PCR: a  
698 promising approach to identify immunosuppression in sepsis. *Crit Care* **17**, R223 (2013).
- 699 21. Leijte, G. P. *et al.* Monocytic HLA-DR expression kinetics in septic shock patients with  
700 different pathogens, sites of infection and adverse outcomes. *Crit Care* **24**, 110 (2020).
- 701 22. Kalantar, K. L. *et al.* IDseq—An open source cloud-based pipeline and analysis service for  
702 metagenomic pathogen detection and monitoring. *Gigascience* **9**, (2020).
- 703 23. Hall, K. K. & Lyman, J. A. Updated Review of Blood Culture Contamination. *Clin Microbiol*  
704 *Rev* **19**, 788–802 (2006).
- 705 24. Langelier, C. *et al.* Detection of Pneumonia Pathogens from Plasma Cell-Free DNA. *Am. J.*  
706 *Respir. Crit. Care Med.* (2019) doi:10.1164/rccm.201904-0905LE.
- 707 25. Libby, D. B. & Bearman, G. Bacteremia due to *Clostridium difficile*—review of the literature.  
708 *International Journal of Infectious Diseases* **13**, e305–e309 (2009).
- 709 26. Frencken, J. F. *et al.* Associations Between Enteral Colonization With Gram-Negative  
710 Bacteria and Intensive Care Unit–Acquired Infections and Colonization of the Respiratory  
711 Tract. *Clinical Infectious Diseases* **66**, 497–503 (2018).

- 712 27. Mudd, P. A. *et al.* Distinct inflammatory profiles distinguish COVID-19 from influenza with  
713 limited contributions from cytokine storm. *Sci. Adv.* **6**, eabe3024 (2020).
- 714 28. Deng, X. *et al.* Metagenomic sequencing with spiked primer enrichment for viral diagnostics  
715 and genomic surveillance. *Nature Microbiology* (2020) doi:10.1038/s41564-019-0637-9.
- 716 29. Quan, J. *et al.* FLASH: a next-generation CRISPR diagnostic for multiplexed detection of  
717 antimicrobial resistance sequences. *Nucleic Acids Res.* (2019) doi:10.1093/nar/gkz418.
- 718 30. Auriemma, C. L. *et al.* Acute respiratory distress syndrome-attributable mortality in critically  
719 ill patients with sepsis. *Intensive Care Med* **46**, 1222–1231 (2020).
- 720 31. Agrawal, A. *et al.* Plasma angiopoietin-2 predicts the onset of acute lung injury in critically ill  
721 patients. *Am J Respir Crit Care Med* **187**, 736–742 (2013).
- 722 32. Levy, M. M. *et al.* 2001 SCCM/ESICM/ACCP/ATS/SIS International Sepsis Definitions  
723 Conference. *Crit Care Med* **31**, 1250–1256 (2003).
- 724 33. Pine, P. S. *et al.* Evaluation of the External RNA Controls Consortium (ERCC) reference  
725 material using a modified Latin square design. *BMC Biotechnology* **16**, 54 (2016).
- 726 34. Mick, E. *et al.* Upper airway gene expression reveals suppressed immune responses to  
727 SARS-CoV-2 compared with other respiratory viruses. *Nature Communications* **11**, (2020).
- 728 35. Wilson, M. R. *et al.* Multiplexed Metagenomic Deep Sequencing To Analyze the  
729 Composition of High-Priority Pathogen Reagents. *mSystems* **1**, e00058-16 (2016).
- 730 36. Dobin, A. *et al.* STAR: ultrafast universal RNA-seq aligner. *Bioinformatics* **29**, 15–21 (2013).
- 731 37. Love, M. I., Huber, W. & Anders, S. Moderated estimation of fold change and dispersion for  
732 RNA-seq data with DESeq2. *Genome Biology* **15**, 550 (2014).
- 733 38. Ignatiadis, N., Klaus, B., Zaugg, J. B. & Huber, W. Data-driven hypothesis weighting  
734 increases detection power in genome-scale multiple testing. *Nature Methods* **13**, 577–580  
735 (2016).

- 736 39. Benjamini, Y. & Hochberg, Y. Controlling the False Discovery Rate: A Practical and  
737 Powerful Approach to Multiple Testing. *Journal of the Royal Statistical Society: Series B*  
738 *(Methodological)* **57**, 289–300 (1995).
- 739 40. Liao, Y., Wang, J., Jaehnig, E. J., Shi, Z. & Zhang, B. WebGestalt 2019: gene set analysis  
740 toolkit with revamped UIs and APIs. *Nucleic Acids Research* **47**, W199–W205 (2019).
- 741 41. Zhao, Y., Tang, H. & Ye, Y. RAPSearch2: a fast and memory-efficient protein similarity  
742 search tool for next-generation sequencing data. *Bioinformatics* **28**, 125–126 (2012).
- 743 42. Weiner-Lasting, L. M. *et al.* Antimicrobial-resistant pathogens associated with adult  
744 healthcare-associated infections: Summary of data reported to the National Healthcare  
745 Safety Network, 2015–2017. *Infect. Control Hosp. Epidemiol.* **41**, 1–18 (2020).
- 746 43. Magill, S. S. *et al.* Changes in Prevalence of Health Care–Associated Infections in U.S.  
747 Hospitals. *New England Journal of Medicine* **379**, 1732–1744 (2018).
- 748 44. Mick, E. *et al.* Upper airway gene expression reveals suppressed immune responses to  
749 SARS-CoV-2 compared with other respiratory viruses. *Nature Communications* **11**, 5854  
750 (2020).
- 751 45. Venables, W. N. & Ripley, B. D. *Modern Applied Statistics with S.* (Springer-Verlag, 2002).  
752 doi:10.1007/978-0-387-21706-2.
- 753 46. Pine, P. S. *et al.* Evaluation of the External RNA Controls Consortium (ERCC) reference  
754 material using a modified Latin square design. *BMC Biotechnol* **16**, 54 (2016).
- 755 47. Cortes, C. & Vapnik, V. Support-Vector Networks. *Mach. Learn.* **20**, 273–297 (1995).
- 756 48. Pedregosa, F. *et al.* Scikit-learn: Machine Learning in Python. *Journal of Machine Learning*  
757 *Research* **12**, 2825–2830 (2011).
- 758 49. Meyer, D. *et al.* Package ‘e1071’. <https://cran.r-project.org/web/packages/e1071/e1071.pdf>  
759 (2022).
- 760 50. Liaw, A. & Wiener, M. Classification and Regression by randomForest. *R News* **2**, 18–22  
761 (2002).

- 762 51. Friedman, J., Hastie, T. & Tibshirani, R. Regularization Paths for Generalized Linear Models  
763 via Coordinate Descent. *Journal of Statistical Software, Articles* **33**, 1–22 (2010).
- 764 52. R Core Team. *R: A Language and Environment for Statistical Computing*. (R Foundation for  
765 Statistical Computing, 2020).
- 766

## Supplementary Materials

**Supplementary Table 1a.** Summary of clinical and demographic features of patients evaluated in whole blood gene expression analyses (n=221). These include patients with microbiologically confirmed sepsis (Sepsis<sup>BSI</sup> and Sepsis<sup>non-BSI</sup>) and those with non-infectious critical illnesses (No-Sepsis). Source data are tabulated in (Supplementary Data 16).

| Whole Blood                                |                  | Sepsis <sup>BSI</sup><br>(n=60) | Sepsis <sup>non-BSI</sup><br>(n=69) | No-Sepsis<br>(n=92) | Sepsis<br>vs No-Sepsis<br>P value* |
|--------------------------------------------|------------------|---------------------------------|-------------------------------------|---------------------|------------------------------------|
| Age<br>(median, Q1-Q3/%)                   |                  | 63.5 (50.8-73.3)                | 68 (58-80)                          | 65.5 (54-74.5)      | 0.51                               |
| Gender (median, %)                         | Male             | 41 (68.3%)                      | 40 (58%)                            | 53 (57.6%)          | 0.49                               |
|                                            | Female           | 19 (31.7%)                      | 28 (40.6%)                          | 39 (42.4%)          |                                    |
|                                            | Transgender      | 0 (0%)                          | 1 (1.4%)                            | 0 (0%)              |                                    |
| Race (n, %)                                | Caucasian        | 20 (33.3%)                      | 29 (42%)                            | 37 (40.2%)          | 0.63                               |
|                                            | Asian            | 17 (28.3%)                      | 21 (30.4%)                          | 24 (26.1%)          |                                    |
|                                            | African American | 10 (16.7%)                      | 11 (15.9%)                          | 17 (18.5%)          |                                    |
|                                            | Other            | 12 (20%)                        | 5 (7.2%)                            | 14 (15.2%)          |                                    |
|                                            | Unknown          | 0 (0%)                          | 3 (4.3%)                            | 0 (0%)              |                                    |
|                                            | Native American  | 1 (1.7%)                        | 0 (0%)                              | 0 (0%)              |                                    |
|                                            | Non-LatinX       | 51 (85%)                        | 60 (87%)                            | 79 (85.9%)          |                                    |
| Ethnicity (n, %)                           | LatinX           | 9 (15%)                         | 6 (8.7%)                            | 12 (13%)            | 0.76                               |
|                                            | NA               | 0 (0%)                          | 3 (4.3%)                            | 1 (1.1%)            |                                    |
|                                            |                  |                                 |                                     |                     |                                    |
| Temp Max<br>(median, Q1-Q3%)               |                  | 38.1<br>(37.1-38.9)             | 37.6<br>(37-38.4)                   | 37.3<br>(36.1-37.9) | < 0.001                            |
| WBC Max<br>(median, Q1-Q3%)                |                  | 15.5<br>(10.1-23.8)             | 13.9<br>(9.5-19.2)                  | 13.15<br>(9.5-18.9) | 0.24                               |
| APACHEIII<br>(median, Q1-Q3%)              |                  | 69 (53-85)                      | 50 (46-66)                          | 64 (50-78)          | 0.17                               |
| SIRS                                       | 4                | 39 (65%)                        | 26 (37.7%)                          | 27 (29.3%)          | 0.01                               |
|                                            | 3                | 16 (26.7%)                      | 30 (43.5%)                          | 42 (45.7%)          |                                    |
|                                            | 2                | 5 (8.3%)                        | 12 (17.4%)                          | 22 (23.9%)          |                                    |
|                                            | 1                | 0 (0%)                          | 0 (0.0%)                            | 1 (1.1%)            |                                    |
| Bacterial infection <sup>‡</sup>           |                  | 60 (100.0%)                     | 50 (72.5%)                          | 0 (0.0%)            | < 0.001                            |
| Viral +/- Bacterial infection <sup>‡</sup> |                  | 3 (5.0%)                        | 21 (30.4%)                          | 0 (0.0%)            | < 0.001                            |
| 28-day mortality (n, %)                    |                  | 23 (38.3%)                      | 15 (21.7%)                          | 32 (34.8%)          | 0.49                               |
| Intubated (n, %)                           |                  | 47 (78.3%)                      | 59 (85.5%)                          | 86 (93.5%)          | 0.02                               |
| Vasopressors (n, %)                        |                  | 54 (90%)                        | 51 (73.9%)                          | 59 (64.1%)          | < 0.01                             |
| Immunocompromised <sup>#</sup> (n, %)      |                  | 7 (11.7%)                       | 6 (8.7%)                            | 6 (6.5%)            | 0.49                               |
| Antibiotics <sup>†</sup> (n, %)            |                  | 59 (98.3%)                      | 66 (95.7%)                          | 73 (79.3%)          | < 0.001                            |

\*Sepsis<sup>BSI</sup> + Sepsis<sup>non-BSI</sup> vs No-Sepsis P value calculated by Mann-Whitney (continuous) or chi-squared (categorical)

<sup>‡</sup>Based on clinical microbiology testing

<sup>#</sup>Immunocompromise was defined as: history of solid organ transplantation, bone marrow transplantation, HIV/AIDS with CD4 < 200, leukemia or other hematologic malignancy, autoimmune inflammatory disease, or primary immunodeficiency.

<sup>†</sup>Antibiotics administered on or before the first day of study enrollment.

**Supplementary Table 1b.** Summary of clinical and demographic features of patients with plasma RNA-seq data, evaluated in all analyses (n=138). All sepsis adjudication groups represented. Source data are tabulated in (Supplementary Data 17).

| Plasma                                     |                  | Sepsis <sup>BSI</sup><br>(n=42)<br>Median/n<br>(Q1-Q3/%) | Sepsis <sup>non-BSI</sup><br>(n=31)<br>Median/n<br>(Q1-Q3/%) | No-Sepsis<br>(n=37)<br>Median/n<br>(Q1-Q3/%) | P value*<br>Sepsis <sup>BSI+non-BSI</sup><br>v No-Sepsis | Sepsis <sup>suspected</sup><br>(n=19)<br>Median/n<br>(Q1-Q3/%) | Indeterm<br>(n=9)<br>Median/n<br>(Q1-Q3/%) | Overall<br>P value <sup>†</sup> |
|--------------------------------------------|------------------|----------------------------------------------------------|--------------------------------------------------------------|----------------------------------------------|----------------------------------------------------------|----------------------------------------------------------------|--------------------------------------------|---------------------------------|
| Age<br>(median, Q1-Q3/%)                   |                  | 63.5 (51.25-72)                                          | 69 (58-78.5)                                                 | 66 (55-79)                                   | 0.45                                                     | 69 (55-80)                                                     | 72 (63-80)                                 | 0.12                            |
| Gender<br>(median, %)                      | Male             | 28 (66.7%)                                               | 17 (54.8%)                                                   | 21 (56.8%)                                   | 0.77                                                     | 9 (47.4%)                                                      | 3 (33.3%)                                  | 0.24                            |
|                                            | Female           | 14 (33.3%)                                               | 14 (45.2%)                                                   | 16 (43.2%)                                   |                                                          | 9 (47.4%)                                                      | 6 (66.7%)                                  |                                 |
|                                            | Transgender      | 0 (0%)                                                   | 0 (0%)                                                       | 0 (0%)                                       |                                                          | 1 (5.3%)                                                       | 0 (0%)                                     |                                 |
| Race (n, %)                                | Caucasian        | 13 (31%)                                                 | 12 (38.7%)                                                   | 14 (37.8%)                                   | 0.86                                                     | 4 (21.1%)                                                      | 7 (77.8%)                                  | 0.50                            |
|                                            | Asian            | 12 (28.6%)                                               | 10 (32.3%)                                                   | 13 (35.1%)                                   |                                                          | 9 (47.4%)                                                      | 1 (11.1%)                                  |                                 |
|                                            | African American | 8 (19%)                                                  | 6 (19.4%)                                                    | 7 (18.9%)                                    |                                                          | 3 (15.8%)                                                      | 1 (11.1%)                                  |                                 |
|                                            | Other            | 8 (19%)                                                  | 2 (6.5%)                                                     | 3 (8.1%)                                     |                                                          | 3 (15.8%)                                                      | 0 (0%)                                     |                                 |
|                                            | Native American  | 1 (2.4%)                                                 | 0 (0%)                                                       | 0 (0%)                                       |                                                          | 0 (0%)                                                         | 0 (0%)                                     |                                 |
|                                            | Unknown          | 0 (0%)                                                   | 1 (3.2%)                                                     | 0 (0%)                                       |                                                          | 0 (0%)                                                         | 0 (0%)                                     |                                 |
| Ethnicity (n, %)                           | Non-LatinX       | 36 (85.7%)                                               | 28 (90.3%)                                                   | 35 (94.6%)                                   | 0.48                                                     | 16 (84.2%)                                                     | 8 (88.9%)                                  | 0.62                            |
|                                            | LatinX           | 6 (14.3%)                                                | 2 (6.5%)                                                     | 2 (5.4%)                                     |                                                          | 3 (15.8%)                                                      | 1 (11.1%)                                  |                                 |
|                                            | NA               | 0 (0%)                                                   | 1 (3.2%)                                                     | 0 (0%)                                       |                                                          | 0 (0%)                                                         | 0 (0%)                                     |                                 |
| Temp Max<br>(median, Q1-Q3/%)              |                  | 38.05<br>(37.1-38.9)                                     | 37.8<br>(37.1-38.5)                                          | 37.1<br>(36.1-38)                            | < 0.01                                                   | 37<br>(36.6-38.2)                                              | 35.8<br>(34.9-37.2)                        | < 0.001                         |
| WBC Max<br>(median, Q1-Q3/%)               |                  | 16.05<br>(6.5-26.6)                                      | 17.4<br>(11.2-22.8)                                          | 13<br>(9.9-20.6)                             | 0.40                                                     | 19.3<br>(12.8-26.1)                                            | 15.3<br>(9.7-19.7)                         | 0.60                            |
| APACHEIII<br>(median, Q1-Q3/%)             |                  | 72.5 (52-85)                                             | 54 (46-69)                                                   | 72 (57-81)                                   | 0.20                                                     | 70 (61-89)                                                     | 72 (65-93)                                 | 0.04                            |
| SIRS                                       | 4                | 28 (66.7%)                                               | 13 (41.9%)                                                   | 15 (40.5%)                                   | 0.19                                                     | 12 (63.2%)                                                     | 5 (55.6%)                                  | 0.52                            |
|                                            | 3                | 11 (26.2%)                                               | 15 (48.4%)                                                   | 15 (40.5%)                                   |                                                          | 5 (26.3%)                                                      | 3 (33.3%)                                  |                                 |
|                                            | 2                | 3 (7.1%)                                                 | 3 (9.7%)                                                     | 6 (16.2%)                                    |                                                          | 2 (10.5%)                                                      | 1 (11.1%)                                  |                                 |
|                                            | 1                | 0 (0%)                                                   | 0 (0%)                                                       | 1 (2.7%)                                     |                                                          | 0 (0%)                                                         | 0 (0%)                                     |                                 |
| Bacterial infection <sup>‡</sup>           |                  | 42 (100.0%)                                              | 24 (77.4%)                                                   | 0 (0.0%)                                     | < 0.001                                                  | 0 (0.0%)                                                       | 0 (0.0%)                                   | 1.00                            |
| Viral +/- Bacterial infection <sup>‡</sup> |                  | 2 (4.8%)                                                 | 11 (35.5%)                                                   | 0 (0.0%)                                     | < 0.001                                                  | 0 (0.0%)                                                       | 0 (0.0%)                                   | 1.00                            |
| 28-day mortality (n, %)                    |                  | 20 (47.6%)                                               | 8 (25.8%)                                                    | 18 (48.6%)                                   | 0.41                                                     | 11 (57.9%)                                                     | 7 (77.8%)                                  | 0.04                            |
| Intubated (n, %)                           |                  | 32 (76.2%)                                               | 28 (90.3%)                                                   | 35 (94.6%)                                   | 0.13                                                     | 18 (94.7%)                                                     | 9 (100%)                                   | 0.05                            |
| Vasopressors (n, %)                        |                  | 40 (95.2%)                                               | 23 (74.2%)                                                   | 31 (83.8%)                                   | 0.95                                                     | 18 (94.7%)                                                     | 8 (88.9%)                                  | 0.08                            |
| Immunocompromised <sup>#</sup> (n, %)      |                  | 6 (14.3%)                                                | 5 (16.1%)                                                    | 4 (10.8%)                                    | 0.75                                                     | 5 (26.3%)                                                      | 2 (22.2%)                                  | 0.63                            |
| Antibiotics <sup>*</sup> (n, %)            |                  | 41 (97.6%)                                               | 31 (100.0%)                                                  | 31 (83.8%)                                   | < 0.01                                                   | 19 (100.0%)                                                    | 8 (88.9%)                                  | 0.02                            |

\*Mann-Whitney (continuous) /chi-squared (categorical) †Kruskal-Wallis (continuous) / chi-squared (categorical)

‡Based on clinical microbiology testing

#Immunocompromise was defined as: history of solid organ transplantation, bone marrow transplantation, HIV/AIDS with CD4 < 200, leukemia or other hematologic malignancy, autoimmune inflammatory disease, or primary immunodeficiency.

\*Antibiotics administered on or before the first day of study enrollment.

**Supplementary Table 2. Comparison of machine learning models for host-based sepsis classification.** Area under the receiver operator characteristic curve (AUC) for three different machine learning models assessed for classifier construction. The AUC for cross-validation in the training set (standard deviation in parentheses) is listed first, and the AUC for the first validation split is listed second, after the vertical bar. The bagged support vector machine (bSVM) model performed best overall.

| Classifier           | Bagged Support Vector Machine | Random Forest      | Gradient Boosted Tree |
|----------------------|-------------------------------|--------------------|-----------------------|
| Whole blood - sepsis | 0.81 (0.05)   0.82            | 0.80 (0.06)   0.86 | 0.79 (0.05)   0.84    |
| Plasma - sepsis      | 0.97 (0.03)   0.77            | 0.76 (0.05)   0.79 | 0.70 (0.09)   0.82    |
| Whole blood - viral  | 0.90 (0.07)   0.79            | 0.83 (0.08)   0.75 | 0.78 (0.07)   0.69    |
| Plasma - viral       | 0.94 (0.09)   0.96            | 0.77 (0.09)   0.81 | 0.72 (0.19)   0.60    |

**Supplementary Table 3a.** Clinical variables used for classifier construction. Fever: > 38C, anemia: hemoglobin < 7, thrombocytopenia: platelets < 50, acute renal failure: creatinine > 2.0.

|                       |            |                            |
|-----------------------|------------|----------------------------|
| Anemia                | Temp Max   | Creatinine Max             |
| Hyperkalemia          | Fever      | Creatinine Min             |
| Hypokalemia           | Temp Min   | Acute Renal Failure        |
| Hypernatremia         | WBC Max    | Platelets Min              |
| Hyponatremia          | WBC Min    | Thrombocytopenia           |
| Hypercalcemia         | HR Max     | Requirement for Intubation |
| Hypocalcemia          | HR Min     | Glasgow Coma Scale         |
| Hyperthyroid          | RR Max     | Immunocompromise           |
| Hypothyroid           | RR Min     | Chest Pain                 |
| Adrenal Insufficiency | SIRS total | Volume Overload            |
| Hyperglycemia         | SBP Min    | Creatinine Max             |
| Hypoglycemia          | SBP Max    | Creatinine Min             |

**Supplementary Table 3b.** Average classifier AUC over 10 iterations of training and test from different machine learning classifiers to distinguish Sepsis from No-Sepsis patients using clinical features alone. qSOFA score positive for sepsis if systolic blood pressure < 100 mmHg, respiratory rate > 22 breaths/minute and Glasgow Coma Scale < 13.

| Method                          | AUC, mean (std) |
|---------------------------------|-----------------|
| Support vector machine          | 0.57 (0.04)     |
| Random forest                   | 0.62 (0.04)     |
| Regularized logistic regression | 0.57 (0.07)     |
| qSOFA score                     | 0.48 (0.02)     |



## Supplementary Figures

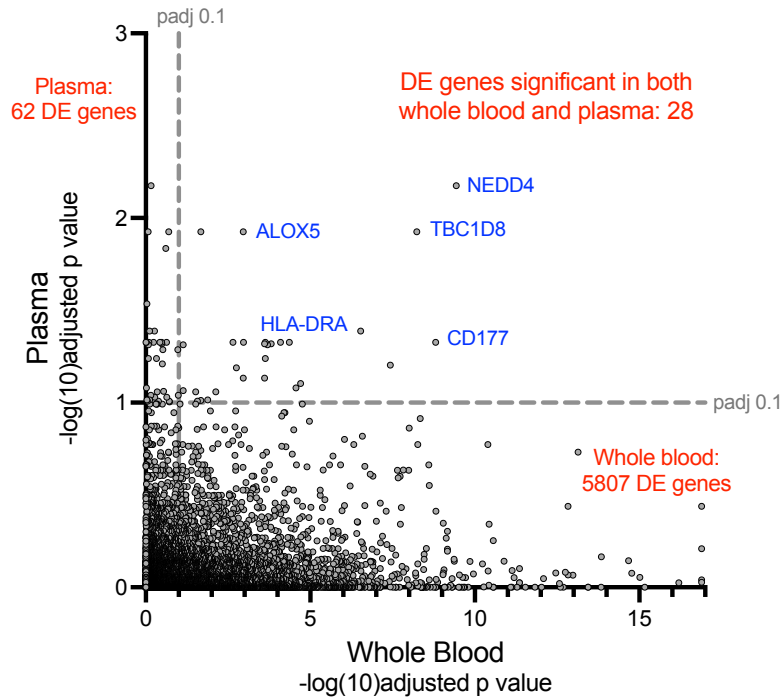

**Supplementary Figure 1.** Overlap of significant genes in the differential expression analyses between the Sepsis and No-Sepsis groups for whole blood and plasma samples. Scatter plot of  $-\log_{10}(\text{adjusted } p\text{-value})$  for individual genes from the differential expression analyses comparing patients with microbiologically confirmed sepsis (Sepsis<sup>BSI</sup> + Sepsis<sup>non-BSI</sup>) versus those without evidence of infection (No-sepsis), from whole blood (x-axis) and plasma (y-axis). P-values derive from Benjamini-Hochberg adjustment. Dashed gray lines indicate the threshold of adjusted p-value < 0.1. Selected, significant, differentially expressed genes highlighted in blue.

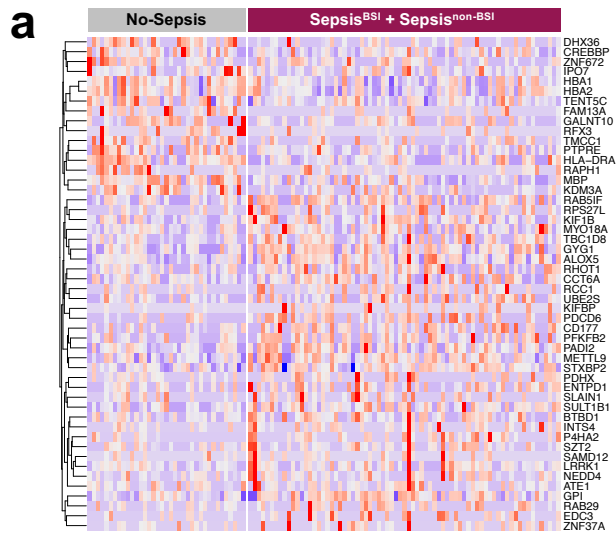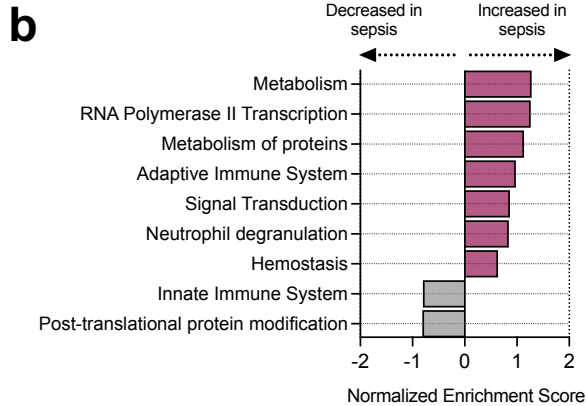

**Supplementary Figure 2.** Plasma host gene expression differentiates patients with sepsis from those with non-infectious critical illnesses. **a)** Heatmap of top 50 differentially expressed genes from whole blood transcriptomics comparing patients with microbiologically confirmed sepsis ( $\text{Sepsis}^{\text{BSI}} + \text{Sepsis}^{\text{non-BSI}}$ ) versus those without evidence of infection (No-sepsis). **b)** Gene set enrichment analysis of the differentially expressed genes. All gene sets included.

## Supplementary Data Files

Supplementary Data 1. Differentially expressed genes (adjusted P value < 0.1) between patients with microbiologically confirmed (Sepsis<sup>BSI</sup> and Sepsis<sup>non-BSI</sup>) and those with non-infectious critical illnesses (No-Sepsis), from whole blood RNA-seq.

Supplementary Data 2. Gene set enrichment analysis of differentially expressed genes between patients with microbiologically confirmed sepsis (Sepsis<sup>BSI</sup> and Sepsis<sup>non-BSI</sup>) and those with non-infectious critical illnesses (No-Sepsis). Data from whole blood RNA-seq. The top 10 positively and negatively enriched pathways by P value are included in table.

Supplementary Data 3. Differentially expressed genes (adjusted P value < 0.1) between patients with sepsis due to bloodstream infections (Sepsis<sup>BSI</sup>) versus peripheral infections (Sepsis<sup>non-BSI</sup>). Data from whole blood RNA-seq.

Supplementary Data 4. Gene set enrichment analysis of differentially expressed genes between patients with sepsis due to bloodstream infections (Sepsis<sup>BSI</sup>) versus peripheral infections (Sepsis<sup>non-BSI</sup>). Data from a) whole blood RNA-seq and b) plasma RNA-seq. The top 10 positively and negatively enriched pathways by P value are included in table.

Supplementary Data 5. a) Area under the receiver operating characteristic curve (AUC) values for 10 independent training set models for a whole blood gene expression support vector machine classifier to distinguish patients with microbiologically confirmed (Sepsis<sup>BSI</sup> and Sepsis<sup>non-BSI</sup>) from those with non-infectious critical illnesses (No-Sepsis). b) Composite list of all genes selected by each classifier model.

Supplementary Data 6. Differentially expressed genes (adjusted P value < 0.1) between patients with microbiologically confirmed (Sepsis<sup>BSI</sup> and Sepsis<sup>non-BSI</sup>) and those with non-infectious critical illnesses (No-Sepsis), from plasma RNA-seq.

Supplementary Data 7. a) AUC values for 10 independent training set models for a plasma gene expression support vector machine classifier to distinguish patients with microbiologically confirmed (Sepsis<sup>BSI</sup> and Sepsis<sup>non-BSI</sup>) from those with non-infectious critical illnesses (No-Sepsis). b) Composite list of all genes selected by each classifier model.

Supplementary Data 8. Mass (pg) of microbial DNA in each sample, calculated based on spiked-in 25 pg ERCC positive controls.

Supplementary Data 9. Sepsis pathogens detected by standard of care clinical microbiology versus plasma mNGS, using the rules-based model.

Supplementary Data 10. Differentially expressed genes (adjusted P value < 0.1) between patients with microbiologically confirmed viral sepsis and those with non-viral sepsis (Sepsis<sup>BSI</sup> and Sepsis<sup>non-BSI</sup> groups), from whole blood RNA-seq.

Supplementary Data 11. Differentially expressed genes (adjusted P value < 0.1) between patients with microbiologically confirmed viral sepsis and those with non-viral sepsis (Sepsis<sup>BSI</sup> and Sepsis<sup>non-BSI</sup> groups), from plasma RNA-seq.

Supplementary Data 12. Gene set enrichment analysis of differentially expressed genes between patients with viral versus non-viral causes of sepsis amongst the Sepsis<sup>BSI</sup> and Sepsis<sup>non-BSI</sup> patients. a) Data from whole blood RNA-seq. b) Data from plasma RNA-seq.

Supplementary Data 13. a) AUC values for 10 independent training set models for a whole blood gene expression support vector machine classifier to distinguish patients with microbiologically confirmed viral versus non-viral sepsis (Sepsis<sup>BSI</sup> and Sepsis<sup>non-BSI</sup>), from whole blood RNA-seq. b) Composite list of all genes selected by each classifier model.

Supplementary Data 14. a) AUC values for 10 independent training set models for a plasma gene expression support vector machine classifier to distinguish patients with microbiologically confirmed viral versus non-viral sepsis (Sepsis<sup>BSI</sup> and Sepsis<sup>non-BSI</sup>), from plasma RNA-seq. b) Composite list of all genes selected by each classifier model.

Supplementary Data 15. Complete integrated host-microbe mNGS dataset. This includes: per-sample classifier predictions for all patients with plasma sequencing data (n=138), including the sepsis diagnostic classifier and the viral sepsis classifier; pathogens detected by clinical diagnostics and by mNGS; and microbial mass per sample.

Supplementary Data 16. Clinical and demographic features of patients evaluated in whole blood gene expression analyses only (n=221). These include patients with microbiologically confirmed sepsis (Sepsis<sup>BSI</sup> and Sepsis<sup>non-BSI</sup>) and those with (No-Sepsis).

Supplementary Data 17. Clinical and demographic features of patients with plasma RNA-seq data, evaluated in all analyses (n=138). All sepsis adjudication groups represented.

Supplementary Data 18. Reference index of established sepsis pathogens derived from the top 20 most prevalent sepsis pathogens reported by both the US CDC/ National Healthcare Safety Network<sup>1</sup> and a point prevalence survey of healthcare-associated infections<sup>2</sup>.

## Supplementary References

1. Weiner-Lastinger, L. M. *et al.* Antimicrobial-resistant pathogens associated with adult healthcare-associated infections: Summary of data reported to the National Healthcare Safety Network, 2015–2017. *Infect. Control Hosp. Epidemiol.* **41**, 1–18 (2020).
2. Magill, S. S. *et al.* Changes in Prevalence of Health Care–Associated Infections in U.S. Hospitals. *New England Journal of Medicine* **379**, 1732–1744 (2018).
